# Supplementary material
Source: publisher figshare collection journal article supplement (https://acs.figshare.com/ndownloader/files/5302234)
Supplement: Supplementary file 1 [file 5302234]

HEADER    UNNAMED                                                               
COMPND    UNNAMED                                                               
REMARK    GENERATED BY SYBYL (TRIPOS, INC.)       30-MAR-16                     
SEQRES   1 C    3  ALA ASN ASN                                                  
SEQRES   1 C    1  GLY                                                          
SEQRES   1 C    6  SER THR ALA VAL VAL GLU                                      
SEQRES   1 C    1  ASN                                                          
SEQRES   1 C    1  MET                                                          
SEQRES   1 C    1  PHE                                                          
SEQRES   1 D    1  PHE                                                          
SEQRES   1 D    1  ARG                                                          
SEQRES   1 D    1  TYR                                                          
SEQRES   1 D    1  GLN                                                          
SEQRES   1 D    1  ILE                                                          
SEQRES   1 D    4  ASN THR PHE SER                                              
SEQRES   1 D    4  THR TYR SER ILE                                              
SEQRES   1 D    2  THR MET                                                      
SEQRES   1 D    7  GLY VAL THR THR CYS LEU ARG                                  
SEQRES   1 D   14  GLN LEU ASN ALA ASP LEU ARG LYS LEU ALA VAL ASN MET          
SEQRES   2 D   14  VAL                                                          
SEQRES   1 D    1  PHE                                                          
SEQRES   1 D    1  PRO                                                          
SEQRES   1 D    1  PHE                                                          
SEQRES   1 D    8  TYR LEU THR VAL ALA ALA VAL PHE                              
SEQRES   1 D    1  MET                                                          
SEQRES   1 D    1  PHE                                                          
SEQRES   1 D    9  ILE PRO ASN ASN VAL LYS THR ALA VAL                          
SEQRES   1 D    6  ALA THR PHE ILE GLY ASN                                      
HET    E70  D 700      43                                                       
HELIX    1  41 ASN C  102  ASN C  102  1                                        
HELIX    2  43 GLY C  144  GLY C  144  1                                        
HELIX    3  44 VAL C  182  GLU C  183  1                                        
HELIX    4  44 ASN C  186  ASN C  186  1                                        
HELIX    5  51 MET C  398  MET C  398  1                                        
HELIX    6  54 PHE D   20  PHE D   20  1                                        
HELIX    7  56 ARG D   48  ARG D   48  1                                        
HELIX    8  56 TYR D   52  TYR D   52  1                                        
HELIX    9  65 THR D  234  MET D  235  1                                        
HELIX   10  65 GLY D  237  THR D  240  1                                        
HELIX   11  66 CYS D  241  ARG D  243  5                                        
HELIX   12  67 LEU D  252  VAL D  260  1                                        
HELIX   13  69 PHE D  296  PHE D  296  1                                        
HELIX   14  71 MET D  332  MET D  332  1                                        
HELIX   15  72 PHE D  343  PHE D  343  5                                        
SHEET    1   H 8 ILE D 165  ILE D 165  0                                        
SHEET    1   H 8 ASN D 167  SER D 170  0                                        
SHEET    1   H 8 THR D 201  SER D 203  0                                        
SHEET    1   H 8 PHE D 268  PHE D 268  0                                        
SHEET    1   H 8 PRO D 270  PRO D 270  0                                        
SHEET    1   H 8 TYR D 312  PHE D 319  0                                        
SHEET    1   H 8 VAL D 351  VAL D 355  0                                        
SHEET    1   H 8 ALA D 375  ASN D 380  0                                        
ATOM      1  N   ALA C 100      45.229  55.369   1.919  1.00 -0.42           N  
ATOM      2  CA  ALA C 100      44.086  55.694   1.060  1.00  0.03           C  
ATOM      3  C   ALA C 100      44.208  56.974   0.254  1.00  0.60           C  
ATOM      4  O   ALA C 100      43.258  57.745   0.143  1.00 -0.57           O  
ATOM      5  CB  ALA C 100      42.808  55.683   1.858  1.00 -0.18           C  
ATOM      6  H   ALA C 100      45.741  54.535   1.712  1.00  0.27           H  
ATOM      7 HNCA ALA C 100      45.492  55.971   2.699  1.00  0.00           H  
ATOM      8  HB3 ALA C 100      42.873  56.428   2.664  1.00  0.06           H  
ATOM      9  HB2 ALA C 100      42.656  54.684   2.293  1.00  0.06           H  
ATOM     10  HB1 ALA C 100      41.962  55.929   1.199  1.00  0.06           H  
ATOM     11  HA  ALA C 100      44.015  54.878   0.325  1.00  0.08           H  
ATOM     12  N   ASN C 101      45.393  57.193  -0.296  1.00 -0.42           N  
ATOM     13  CA  ASN C 101      45.597  58.234  -1.284  1.00  0.01           C  
ATOM     14  C   ASN C 101      45.373  59.663  -0.818  1.00  0.60           C  
ATOM     15  O   ASN C 101      45.134  60.555  -1.646  1.00 -0.57           O  
ATOM     16  CB  ASN C 101      44.729  57.949  -2.494  1.00 -0.20           C  
ATOM     17  CG  ASN C 101      45.396  57.023  -3.457  1.00  0.71           C  
ATOM     18  OD1 ASN C 101      46.617  56.964  -3.506  1.00 -0.59           O  
ATOM     19  ND2 ASN C 101      44.606  56.289  -4.237  1.00 -0.92           N  
ATOM     20  H   ASN C 101      46.169  56.624  -0.022  1.00  0.27           H  
ATOM     21 HD21 ASN C 101      43.612  56.372  -4.162  1.00  0.42           H  
ATOM     22 HD22 ASN C 101      45.006  55.654  -4.898  1.00  0.42           H  
ATOM     23  HB3 ASN C 101      44.512  58.898  -3.007  1.00  0.08           H  
ATOM     24  HB2 ASN C 101      43.788  57.491  -2.156  1.00  0.08           H  
ATOM     25  HA  ASN C 101      46.649  58.169  -1.598  1.00  0.10           H  
ATOM     26  N   ASN C 102      45.463  59.884   0.498  1.00 -0.42           N  
ATOM     27  CA  ASN C 102      45.372  61.249   1.043  1.00  0.01           C  
ATOM     28  C   ASN C 102      46.214  61.644   2.249  1.00  0.60           C  
ATOM     29  O   ASN C 102      46.266  60.961   3.272  1.00 -0.57           O  
ATOM     30  CB  ASN C 102      43.922  61.716   1.230  1.00 -0.20           C  
ATOM     31  CG  ASN C 102      43.225  61.061   2.411  1.00  0.71           C  
ATOM     32  OD1 ASN C 102      43.293  59.844   2.597  1.00 -0.59           O  
ATOM     33  ND2 ASN C 102      42.510  61.866   3.191  1.00 -0.92           N  
ATOM     34  H   ASN C 102      45.594  59.112   1.120  1.00  0.27           H  
ATOM     35 HD21 ASN C 102      42.455  62.843   2.984  1.00  0.42           H  
ATOM     36 HD22 ASN C 102      42.028  61.495   3.984  1.00  0.42           H  
ATOM     37  HB3 ASN C 102      43.358  61.477   0.316  1.00  0.08           H  
ATOM     38  HB2 ASN C 102      43.924  62.805   1.386  1.00  0.08           H  
ATOM     39  HA  ASN C 102      45.772  61.873   0.230  1.00  0.10           H  
TER      40      ASN C 102                                                      
ATOM     41  N   GLY C 144      49.469  58.434  -0.903  1.00 -0.42           N  
ATOM     42  CA  GLY C 144      48.929  58.522   0.446  1.00 -0.03           C  
ATOM     43  C   GLY C 144      49.926  58.703   1.571  1.00  0.60           C  
ATOM     44  O   GLY C 144      50.045  59.797   2.130  1.00 -0.57           O  
ATOM     45  H   GLY C 144      49.326  57.582  -1.407  1.00  0.27           H  
ATOM     46 HNCA GLY C 144      49.976  59.215  -1.320  1.00  0.00           H  
ATOM     47  HA2 GLY C 144      48.371  57.594   0.642  1.00  0.07           H  
ATOM     48  HA3 GLY C 144      48.238  59.378   0.473  1.00  0.07           H  
TER      49      GLY C 144                                                      
ATOM     50  N   SER C 178      50.431  56.842 -12.852  1.00 -0.42           N  
ATOM     51  CA  SER C 178      49.890  57.383 -11.612  1.00 -0.02           C  
ATOM     52  C   SER C 178      48.812  56.473 -11.025  1.00  0.60           C  
ATOM     53  O   SER C 178      48.228  55.620 -11.723  1.00 -0.57           O  
ATOM     54  CB  SER C 178      49.342  58.808 -11.831  1.00  0.21           C  
ATOM     55  OG  SER C 178      47.965  58.804 -12.169  1.00 -0.65           O  
ATOM     56  H   SER C 178      49.796  56.453 -13.519  1.00  0.27           H  
ATOM     57 HNCA SER C 178      51.434  56.860 -13.035  1.00  0.00           H  
ATOM     58  HG  SER C 178      47.667  59.697 -12.295  1.00  0.43           H  
ATOM     59  HB3 SER C 178      49.906  59.283 -12.647  1.00  0.04           H  
ATOM     60  HB2 SER C 178      49.478  59.387 -10.906  1.00  0.04           H  
ATOM     61  HA  SER C 178      50.712  57.444 -10.884  1.00  0.08           H  
ATOM     62  N   THR C 179      48.574  56.665  -9.728  1.00 -0.42           N  
ATOM     63  CA  THR C 179      47.521  55.967  -9.009  1.00 -0.04           C  
ATOM     64  C   THR C 179      46.276  56.830  -8.907  1.00  0.60           C  
ATOM     65  O   THR C 179      45.189  56.390  -9.289  1.00 -0.57           O  
ATOM     66  CB  THR C 179      47.962  55.607  -7.574  1.00  0.37           C  
ATOM     67  OG1 THR C 179      49.333  55.183  -7.556  1.00 -0.68           O  
ATOM     68  CG2 THR C 179      47.169  54.389  -7.069  1.00 -0.24           C  
ATOM     69  H   THR C 179      49.144  57.317  -9.228  1.00  0.27           H  
ATOM     70 HG22 THR C 179      47.833  53.737  -6.481  1.00  0.06           H  
ATOM     71 HG21 THR C 179      46.771  53.828  -7.928  1.00  0.06           H  
ATOM     72 HG23 THR C 179      46.336  54.730  -6.437  1.00  0.06           H  
ATOM     73  HG1 THR C 179      49.586  54.966  -6.666  1.00  0.41           H  
ATOM     74  HB  THR C 179      47.813  56.473  -6.912  1.00  0.00           H  
ATOM     75  HA  THR C 179      47.278  55.043  -9.554  1.00  0.10           H  
ATOM     76  N   ALA C 180      46.457  58.059  -8.411  1.00 -0.42           N  
ATOM     77  CA  ALA C 180      45.369  58.857  -7.854  1.00  0.03           C  
ATOM     78  C   ALA C 180      45.093  60.196  -8.512  1.00  0.60           C  
ATOM     79  O   ALA C 180      45.960  60.844  -9.077  1.00 -0.57           O  
ATOM     80  CB  ALA C 180      45.564  59.038  -6.372  1.00 -0.18           C  
ATOM     81  H   ALA C 180      47.378  58.448  -8.422  1.00  0.27           H  
ATOM     82  HB3 ALA C 180      46.519  59.552  -6.188  1.00  0.06           H  
ATOM     83  HB2 ALA C 180      45.577  58.054  -5.881  1.00  0.06           H  
ATOM     84  HB1 ALA C 180      44.739  59.640  -5.964  1.00  0.06           H  
ATOM     85  HA  ALA C 180      44.456  58.260  -7.992  1.00  0.08           H  
ATOM     86  N   VAL C 181      43.838  60.581  -8.399  1.00 -0.42           N  
ATOM     87  CA  VAL C 181      43.296  61.739  -9.048  1.00 -0.09           C  
ATOM     88  C   VAL C 181      43.620  62.879  -8.151  1.00  0.60           C  
ATOM     89  O   VAL C 181      43.802  63.993  -8.624  1.00 -0.57           O  
ATOM     90  CB  VAL C 181      41.774  61.615  -9.152  1.00  0.30           C  
ATOM     91  CG1 VAL C 181      41.118  62.967  -9.238  1.00 -0.32           C  
ATOM     92  CG2 VAL C 181      41.407  60.760 -10.329  1.00 -0.32           C  
ATOM     93  H   VAL C 181      43.227  60.033  -7.827  1.00  0.27           H  
ATOM     94 HG23 VAL C 181      41.787  61.223 -11.251  1.00  0.08           H  
ATOM     95 HG22 VAL C 181      40.312  60.669 -10.389  1.00  0.08           H  
ATOM     96 HG21 VAL C 181      41.852  59.761 -10.210  1.00  0.08           H  
ATOM     97 HG13 VAL C 181      41.352  63.546  -8.332  1.00  0.08           H  
ATOM     98 HG12 VAL C 181      40.028  62.841  -9.322  1.00  0.08           H  
ATOM     99 HG11 VAL C 181      41.494  63.502 -10.123  1.00  0.08           H  
ATOM    100  HB  VAL C 181      41.408  61.119  -8.241  1.00 -0.03           H  
ATOM    101  HA  VAL C 181      43.739  61.877 -10.046  1.00  0.10           H  
ATOM    102  N   VAL C 182      43.696  62.582  -6.857  1.00 -0.42           N  
ATOM    103  CA  VAL C 182      43.875  63.599  -5.830  1.00 -0.09           C  
ATOM    104  C   VAL C 182      45.367  63.908  -5.577  1.00  0.60           C  
ATOM    105  O   VAL C 182      45.725  64.764  -4.760  1.00 -0.57           O  
ATOM    106  CB  VAL C 182      43.068  63.236  -4.565  1.00  0.30           C  
ATOM    107  CG1 VAL C 182      42.830  61.748  -4.512  1.00 -0.32           C  
ATOM    108  CG2 VAL C 182      43.732  63.710  -3.306  1.00 -0.32           C  
ATOM    109  H   VAL C 182      43.628  61.624  -6.579  1.00  0.27           H  
ATOM    110 HG23 VAL C 182      44.722  63.239  -3.214  1.00  0.08           H  
ATOM    111 HG22 VAL C 182      43.113  63.436  -2.439  1.00  0.08           H  
ATOM    112 HG21 VAL C 182      43.848  64.803  -3.342  1.00  0.08           H  
ATOM    113 HG13 VAL C 182      42.257  61.437  -5.398  1.00  0.08           H  
ATOM    114 HG12 VAL C 182      42.264  61.499  -3.602  1.00  0.08           H  
ATOM    115 HG11 VAL C 182      43.796  61.222  -4.497  1.00  0.08           H  
ATOM    116  HB  VAL C 182      42.091  63.736  -4.635  1.00 -0.03           H  
ATOM    117  HA  VAL C 182      43.435  64.528  -6.221  1.00  0.10           H  
ATOM    118  N   GLU C 183      46.220  63.231  -6.342  1.00 -0.52           N  
ATOM    119  CA  GLU C 183      47.672  63.436  -6.359  1.00  0.04           C  
ATOM    120  C   GLU C 183      48.158  64.871  -6.204  1.00  0.54           C  
ATOM    121  O   GLU C 183      48.859  65.158  -5.267  1.00 -0.58           O  
ATOM    122  CB  GLU C 183      48.249  62.861  -7.645  1.00  0.06           C  
ATOM    123  CG  GLU C 183      49.487  62.012  -7.458  1.00  0.01           C  
ATOM    124  CD  GLU C 183      49.266  60.551  -7.832  1.00  0.81           C  
ATOM    125  OE1 GLU C 183      49.354  59.702  -6.908  1.00 -0.82           O  
ATOM    126  OE2 GLU C 183      49.011  60.253  -9.034  1.00 -0.82           O  
ATOM    127  H   GLU C 183      45.843  62.532  -6.949  1.00  0.29           H  
ATOM    128  HG3 GLU C 183      49.791  62.062  -6.402  1.00 -0.04           H  
ATOM    129  HG2 GLU C 183      50.290  62.419  -8.090  1.00 -0.04           H  
ATOM    130  HB3 GLU C 183      48.505  63.699  -8.310  1.00 -0.02           H  
ATOM    131  HB2 GLU C 183      47.476  62.239  -8.120  1.00 -0.02           H  
ATOM    132  HA  GLU C 183      48.082  62.867  -5.512  1.00  0.11           H  
TER     133      GLU C 183                                                      
ATOM    134  N   ASN C 186      47.897  66.186  -2.523  1.00 -0.42           N  
ATOM    135  CA  ASN C 186      48.916  65.636  -1.635  1.00  0.01           C  
ATOM    136  C   ASN C 186      50.252  66.299  -1.904  1.00  0.60           C  
ATOM    137  O   ASN C 186      50.871  66.816  -0.977  1.00 -0.57           O  
ATOM    138  CB  ASN C 186      49.047  64.104  -1.759  1.00 -0.20           C  
ATOM    139  CG  ASN C 186      47.712  63.375  -1.643  1.00  0.71           C  
ATOM    140  OD1 ASN C 186      46.763  63.875  -1.038  1.00 -0.59           O  
ATOM    141  ND2 ASN C 186      47.636  62.184  -2.232  1.00 -0.92           N  
ATOM    142  H   ASN C 186      47.312  65.558  -3.036  1.00  0.27           H  
ATOM    143 HNCA ASN C 186      47.784  67.195  -2.619  1.00  0.00           H  
ATOM    144 HD21 ASN C 186      48.429  61.814  -2.717  1.00  0.42           H  
ATOM    145 HD22 ASN C 186      46.786  61.659  -2.190  1.00  0.42           H  
ATOM    146  HB3 ASN C 186      49.712  63.744  -0.960  1.00  0.08           H  
ATOM    147  HB2 ASN C 186      49.490  63.869  -2.738  1.00  0.08           H  
ATOM    148  HA  ASN C 186      48.620  65.865  -0.601  1.00  0.10           H  
TER     149      ASN C 186                                                      
ATOM    150  N   MET C 398      41.319  72.233  -9.469  1.00 -0.42           N  
ATOM    151  CA  MET C 398      40.450  71.344  -8.722  1.00 -0.02           C  
ATOM    152  C   MET C 398      39.881  72.125  -7.550  1.00  0.60           C  
ATOM    153  O   MET C 398      38.670  72.329  -7.449  1.00 -0.57           O  
ATOM    154  CB  MET C 398      41.258  70.173  -8.189  1.00  0.03           C  
ATOM    155  CG  MET C 398      41.213  68.920  -9.034  1.00  0.00           C  
ATOM    156  SD  MET C 398      41.849  67.512  -8.050  1.00 -0.27           S  
ATOM    157  CE  MET C 398      43.424  67.180  -8.762  1.00 -0.05           C  
ATOM    158  H   MET C 398      42.304  72.206  -9.301  1.00  0.27           H  
ATOM    159 HNCA MET C 398      40.930  72.878 -10.157  1.00  0.00           H  
ATOM    160  HE3 MET C 398      43.298  66.913  -9.822  1.00  0.07           H  
ATOM    161  HE2 MET C 398      43.900  66.345  -8.227  1.00  0.07           H  
ATOM    162  HE1 MET C 398      44.059  68.075  -8.682  1.00  0.07           H  
ATOM    163 LPD2 MET C 398      41.440  66.973  -8.106  1.00  0.00          LP  
ATOM    164 LPD1 MET C 398      41.910  67.682  -7.396  1.00  0.00          LP  
ATOM    165  HG3 MET C 398      41.838  69.056  -9.929  1.00  0.04           H  
ATOM    166  HG2 MET C 398      40.176  68.718  -9.339  1.00  0.04           H  
ATOM    167  HB3 MET C 398      40.875  69.922  -7.189  1.00  0.02           H  
ATOM    168  HB2 MET C 398      42.308  70.492  -8.110  1.00  0.02           H  
ATOM    169  HA  MET C 398      39.638  70.977  -9.367  1.00  0.09           H  
TER     170      MET C 398                                                      
ATOM    171  N   PHE C 404      37.945  67.714  -4.291  1.00 -0.42           N  
ATOM    172  CA  PHE C 404      37.867  66.545  -3.467  1.00 -0.00           C  
ATOM    173  C   PHE C 404      38.062  66.917  -2.023  1.00  0.60           C  
ATOM    174  O   PHE C 404      37.941  66.086  -1.116  1.00 -0.57           O  
ATOM    175  CB  PHE C 404      38.886  65.544  -3.937  1.00 -0.03           C  
ATOM    176  CG  PHE C 404      38.543  64.911  -5.235  1.00  0.01           C  
ATOM    177  CD1 PHE C 404      38.749  65.577  -6.418  1.00 -0.13           C  
ATOM    178  CD2 PHE C 404      38.030  63.635  -5.272  1.00 -0.13           C  
ATOM    179  CE1 PHE C 404      38.444  64.981  -7.611  1.00 -0.17           C  
ATOM    180  CE2 PHE C 404      37.728  63.032  -6.460  1.00 -0.17           C  
ATOM    181  CZ  PHE C 404      37.935  63.701  -7.630  1.00 -0.11           C  
ATOM    182  H   PHE C 404      38.767  68.281  -4.327  1.00  0.27           H  
ATOM    183 HNCA PHE C 404      37.138  67.975  -4.857  1.00  0.00           H  
ATOM    184  HD2 PHE C 404      37.863  63.100  -4.344  1.00  0.13           H  
ATOM    185  HE2 PHE C 404      37.325  62.026  -6.473  1.00  0.14           H  
ATOM    186  HZ  PHE C 404      37.699  63.226  -8.575  1.00  0.13           H  
ATOM    187  HE1 PHE C 404      38.603  65.516  -8.541  1.00  0.14           H  
ATOM    188  HD1 PHE C 404      39.156  66.582  -6.407  1.00  0.13           H  
ATOM    189  HB3 PHE C 404      38.973  64.754  -3.177  1.00  0.03           H  
ATOM    190  HB2 PHE C 404      39.853  66.057  -4.045  1.00  0.03           H  
ATOM    191  HA  PHE C 404      36.867  66.100  -3.575  1.00  0.10           H  
TER     192      PHE C 404                                                      
ATOM    193  N   PHE D  20      25.731  36.199  -8.552  1.00 -0.42           N  
ATOM    194  CA  PHE D  20      27.001  36.821  -8.191  1.00 -0.00           C  
ATOM    195  C   PHE D  20      27.933  35.779  -7.624  1.00  0.60           C  
ATOM    196  O   PHE D  20      28.994  35.503  -8.186  1.00 -0.57           O  
ATOM    197  CB  PHE D  20      26.733  37.902  -7.151  1.00 -0.03           C  
ATOM    198  CG  PHE D  20      27.949  38.462  -6.528  1.00  0.01           C  
ATOM    199  CD1 PHE D  20      28.635  37.754  -5.557  1.00 -0.13           C  
ATOM    200  CD2 PHE D  20      28.395  39.721  -6.883  1.00 -0.13           C  
ATOM    201  CE1 PHE D  20      29.803  38.274  -4.953  1.00 -0.17           C  
ATOM    202  CE2 PHE D  20      29.542  40.267  -6.292  1.00 -0.17           C  
ATOM    203  CZ  PHE D  20      30.263  39.535  -5.313  1.00 -0.11           C  
ATOM    204  H   PHE D  20      24.888  36.708  -8.377  1.00  0.27           H  
ATOM    205 HNCA PHE D  20      25.704  35.270  -8.971  1.00  0.00           H  
ATOM    206  HD2 PHE D  20      27.852  40.292  -7.627  1.00  0.13           H  
ATOM    207  HE2 PHE D  20      29.881  41.254  -6.584  1.00  0.14           H  
ATOM    208  HZ  PHE D  20      31.154  39.951  -4.856  1.00  0.13           H  
ATOM    209  HE1 PHE D  20      30.338  37.691  -4.212  1.00  0.14           H  
ATOM    210  HD1 PHE D  20      28.269  36.780  -5.253  1.00  0.13           H  
ATOM    211  HB3 PHE D  20      26.108  37.468  -6.357  1.00  0.03           H  
ATOM    212  HB2 PHE D  20      26.188  38.723  -7.640  1.00  0.03           H  
ATOM    213  HA  PHE D  20      27.459  37.273  -9.083  1.00  0.10           H  
TER     214      PHE D  20                                                      
ATOM    215  N   ARG D  48      43.491  36.567  -3.216  1.00 -0.35           N  
ATOM    216  CA  ARG D  48      42.502  37.536  -2.824  1.00 -0.26           C  
ATOM    217  C   ARG D  48      41.188  36.887  -2.427  1.00  0.73           C  
ATOM    218  O   ARG D  48      40.158  37.570  -2.313  1.00 -0.59           O  
ATOM    219  CB  ARG D  48      42.283  38.540  -3.948  1.00 -0.00           C  
ATOM    220  CG  ARG D  48      43.416  39.536  -4.123  1.00  0.04           C  
ATOM    221  CD  ARG D  48      43.272  40.857  -3.349  1.00  0.05           C  
ATOM    222  NE  ARG D  48      44.603  41.422  -3.098  1.00 -0.53           N  
ATOM    223  CZ  ARG D  48      45.150  42.438  -3.785  1.00  0.81           C  
ATOM    224  NH1 ARG D  48      44.445  43.047  -4.782  1.00 -0.86           N  
ATOM    225  NH2 ARG D  48      46.412  42.832  -3.452  1.00 -0.86           N  
ATOM    226  H   ARG D  48      43.349  36.007  -4.032  1.00  0.27           H  
ATOM    227 HNCA ARG D  48      44.338  36.451  -2.660  1.00  0.00           H  
ATOM    228 HH21 ARG D  48      46.917  42.353  -2.693  1.00  0.45           H  
ATOM    229 HH22 ARG D  48      46.860  43.608  -3.960  1.00  0.45           H  
ATOM    230 HH11 ARG D  48      43.492  42.727  -5.008  1.00  0.45           H  
ATOM    231 HH12 ARG D  48      44.865  43.826  -5.308  1.00  0.45           H  
ATOM    232  HE  ARG D  48      45.160  41.008  -2.337  1.00  0.35           H  
ATOM    233  HD3 ARG D  48      42.767  40.668  -2.390  1.00  0.07           H  
ATOM    234  HD2 ARG D  48      42.678  41.567  -3.942  1.00  0.07           H  
ATOM    235  HG3 ARG D  48      43.490  39.779  -5.193  1.00  0.03           H  
ATOM    236  HG2 ARG D  48      44.346  39.051  -3.792  1.00  0.03           H  
ATOM    237  HB3 ARG D  48      41.361  39.101  -3.735  1.00  0.03           H  
ATOM    238  HB2 ARG D  48      42.164  37.983  -4.889  1.00  0.03           H  
ATOM    239  HA  ARG D  48      42.888  38.078  -1.948  1.00  0.16           H  
TER     240      ARG D  48                                                      
ATOM    241  N   TYR D  52      36.697  37.771   0.105  1.00 -0.42           N  
ATOM    242  CA  TYR D  52      35.275  37.474   0.012  1.00 -0.00           C  
ATOM    243  C   TYR D  52      34.877  36.153   0.618  1.00  0.60           C  
ATOM    244  O   TYR D  52      33.712  35.762   0.524  1.00 -0.57           O  
ATOM    245  CB  TYR D  52      34.859  37.463  -1.439  1.00 -0.02           C  
ATOM    246  CG  TYR D  52      34.414  38.787  -2.007  1.00 -0.00           C  
ATOM    247  CD1 TYR D  52      35.213  39.468  -2.916  1.00 -0.19           C  
ATOM    248  CD2 TYR D  52      33.171  39.330  -1.688  1.00 -0.19           C  
ATOM    249  CE1 TYR D  52      34.799  40.671  -3.475  1.00 -0.23           C  
ATOM    250  CE2 TYR D  52      32.744  40.532  -2.248  1.00 -0.23           C  
ATOM    251  CZ  TYR D  52      33.564  41.195  -3.143  1.00  0.32           C  
ATOM    252  OH  TYR D  52      33.169  42.391  -3.697  1.00 -0.56           O  
ATOM    253  H   TYR D  52      37.369  37.165  -0.321  1.00  0.27           H  
ATOM    254 HNCA TYR D  52      37.007  38.594   0.603  1.00  0.00           H  
ATOM    255  HD2 TYR D  52      32.525  38.808  -0.992  1.00  0.17           H  
ATOM    256  HE2 TYR D  52      31.777  40.944  -1.984  1.00  0.17           H  
ATOM    257  HH  TYR D  52      33.845  42.706  -4.285  1.00  0.40           H  
ATOM    258  HE1 TYR D  52      35.443  41.197  -4.170  1.00  0.17           H  
ATOM    259  HD1 TYR D  52      36.176  39.054  -3.194  1.00  0.17           H  
ATOM    260  HB2 TYR D  52      34.025  36.754  -1.545  1.00  0.03           H  
ATOM    261  HB3 TYR D  52      35.716  37.113  -2.033  1.00  0.03           H  
ATOM    262  HA  TYR D  52      34.729  38.271   0.538  1.00  0.09           H  
TER     263      TYR D  52                                                      
ATOM    264  N   GLN D 133      37.329  45.938   5.820  1.00 -0.42           N  
ATOM    265  CA  GLN D 133      37.252  47.058   4.887  1.00 -0.00           C  
ATOM    266  C   GLN D 133      35.933  47.804   4.951  1.00  0.60           C  
ATOM    267  O   GLN D 133      35.896  49.027   5.084  1.00 -0.57           O  
ATOM    268  CB  GLN D 133      37.331  46.473   3.498  1.00 -0.00           C  
ATOM    269  CG  GLN D 133      38.126  47.211   2.508  1.00 -0.06           C  
ATOM    270  CD  GLN D 133      38.167  46.428   1.231  1.00  0.70           C  
ATOM    271  OE1 GLN D 133      38.850  45.401   1.142  1.00 -0.61           O  
ATOM    272  NE2 GLN D 133      37.392  46.864   0.251  1.00 -0.94           N  
ATOM    273  H   GLN D 133      37.370  45.019   5.428  1.00  0.27           H  
ATOM    274 HNCA GLN D 133      37.341  46.086   6.829  1.00  0.00           H  
ATOM    275 HE21 GLN D 133      36.822  47.674   0.387  1.00  0.43           H  
ATOM    276 HE22 GLN D 133      37.376  46.383  -0.626  1.00  0.43           H  
ATOM    277  HG3 GLN D 133      39.149  47.351   2.887  1.00  0.04           H  
ATOM    278  HG2 GLN D 133      37.666  48.193   2.324  1.00  0.04           H  
ATOM    279  HB3 GLN D 133      36.304  46.399   3.110  1.00  0.02           H  
ATOM    280  HB2 GLN D 133      37.763  45.465   3.586  1.00  0.02           H  
ATOM    281  HA  GLN D 133      38.084  47.754   5.074  1.00  0.09           H  
TER     282      GLN D 133                                                      
ATOM    283  N   ILE D 165      33.733  51.527   5.041  1.00 -0.42           N  
ATOM    284  CA  ILE D 165      32.985  52.115   3.925  1.00 -0.06           C  
ATOM    285  C   ILE D 165      31.760  51.336   3.421  1.00  0.60           C  
ATOM    286  O   ILE D 165      31.551  50.169   3.773  1.00 -0.57           O  
ATOM    287  CB  ILE D 165      33.908  52.638   2.779  1.00  0.13           C  
ATOM    288  CG1 ILE D 165      34.684  51.506   2.129  1.00 -0.04           C  
ATOM    289  CG2 ILE D 165      34.817  53.760   3.276  1.00 -0.32           C  
ATOM    290  CD1 ILE D 165      34.407  51.444   0.685  1.00 -0.07           C  
ATOM    291  H   ILE D 165      34.472  50.873   4.878  1.00  0.27           H  
ATOM    292 HNCA ILE D 165      33.496  51.789   5.998  1.00  0.00           H  
ATOM    293 HG23 ILE D 165      34.202  54.599   3.632  1.00  0.09           H  
ATOM    294 HG22 ILE D 165      35.462  54.102   2.453  1.00  0.09           H  
ATOM    295 HG21 ILE D 165      35.442  53.387   4.101  1.00  0.09           H  
ATOM    296 HD13 ILE D 165      33.334  51.264   0.525  1.00  0.02           H  
ATOM    297 HD12 ILE D 165      34.987  50.625   0.235  1.00  0.02           H  
ATOM    298 HD11 ILE D 165      34.693  52.397   0.215  1.00  0.02           H  
ATOM    299 HG13 ILE D 165      34.390  50.554   2.594  1.00  0.02           H  
ATOM    300 HG12 ILE D 165      35.761  51.672   2.283  1.00  0.02           H  
ATOM    301  HB  ILE D 165      33.256  53.068   2.004  1.00  0.02           H  
ATOM    302  HA  ILE D 165      32.548  53.027   4.358  1.00  0.09           H  
TER     303      ILE D 165                                                      
ATOM    304  N   ASN D 167      29.058  50.164   0.497  1.00 -0.42           N  
ATOM    305  CA  ASN D 167      28.861  49.873  -0.897  1.00  0.01           C  
ATOM    306  C   ASN D 167      27.528  49.151  -1.149  1.00  0.60           C  
ATOM    307  O   ASN D 167      27.112  48.307  -0.346  1.00 -0.57           O  
ATOM    308  CB  ASN D 167      30.067  49.049  -1.366  1.00 -0.20           C  
ATOM    309  CG  ASN D 167      30.111  48.866  -2.880  1.00  0.71           C  
ATOM    310  OD1 ASN D 167      29.112  49.076  -3.571  1.00 -0.59           O  
ATOM    311  ND2 ASN D 167      31.271  48.454  -3.396  1.00 -0.92           N  
ATOM    312  H   ASN D 167      29.151  49.403   1.139  1.00  0.27           H  
ATOM    313 HNCA ASN D 167      29.102  51.129   0.825  1.00  0.00           H  
ATOM    314 HD21 ASN D 167      32.052  48.282  -2.796  1.00  0.42           H  
ATOM    315 HD22 ASN D 167      31.359  48.317  -4.383  1.00  0.42           H  
ATOM    316  HB3 ASN D 167      30.018  48.057  -0.894  1.00  0.08           H  
ATOM    317  HB2 ASN D 167      30.987  49.562  -1.048  1.00  0.08           H  
ATOM    318  HA  ASN D 167      28.842  50.820  -1.457  1.00  0.10           H  
ATOM    319  N   THR D 168      26.844  49.519  -2.236  1.00 -0.42           N  
ATOM    320  CA  THR D 168      25.600  48.841  -2.636  1.00 -0.04           C  
ATOM    321  C   THR D 168      25.294  48.871  -4.132  1.00  0.60           C  
ATOM    322  O   THR D 168      25.447  49.904  -4.811  1.00 -0.57           O  
ATOM    323  CB  THR D 168      24.315  49.333  -1.864  1.00  0.37           C  
ATOM    324  OG1 THR D 168      23.629  50.321  -2.631  1.00 -0.68           O  
ATOM    325  CG2 THR D 168      24.641  50.095  -0.622  1.00 -0.24           C  
ATOM    326  H   THR D 168      27.186  50.276  -2.793  1.00  0.27           H  
ATOM    327 HG22 THR D 168      23.936  50.932  -0.510  1.00  0.06           H  
ATOM    328 HG21 THR D 168      25.667  50.486  -0.690  1.00  0.06           H  
ATOM    329 HG23 THR D 168      24.560  49.428   0.249  1.00  0.06           H  
ATOM    330  HG1 THR D 168      22.858  50.610  -2.158  1.00  0.41           H  
ATOM    331  HB  THR D 168      23.669  48.471  -1.642  1.00  0.00           H  
ATOM    332  HA  THR D 168      25.745  47.784  -2.367  1.00  0.10           H  
ATOM    333  N   PHE D 169      24.836  47.717  -4.620  1.00 -0.42           N  
ATOM    334  CA  PHE D 169      24.264  47.572  -5.941  1.00 -0.00           C  
ATOM    335  C   PHE D 169      22.825  47.591  -5.621  1.00  0.60           C  
ATOM    336  O   PHE D 169      22.325  46.681  -4.995  1.00 -0.57           O  
ATOM    337  CB  PHE D 169      24.630  46.221  -6.547  1.00 -0.03           C  
ATOM    338  CG  PHE D 169      26.110  46.007  -6.674  1.00  0.01           C  
ATOM    339  CD1 PHE D 169      26.848  45.439  -5.616  1.00 -0.13           C  
ATOM    340  CD2 PHE D 169      26.788  46.411  -7.824  1.00 -0.13           C  
ATOM    341  CE1 PHE D 169      28.233  45.258  -5.708  1.00 -0.17           C  
ATOM    342  CE2 PHE D 169      28.167  46.233  -7.936  1.00 -0.17           C  
ATOM    343  CZ  PHE D 169      28.891  45.646  -6.871  1.00 -0.11           C  
ATOM    344  H   PHE D 169      24.891  46.905  -4.039  1.00  0.27           H  
ATOM    345  HD2 PHE D 169      26.238  46.868  -8.639  1.00  0.13           H  
ATOM    346  HE2 PHE D 169      28.683  46.544  -8.837  1.00  0.14           H  
ATOM    347  HZ  PHE D 169      29.961  45.498  -6.962  1.00  0.13           H  
ATOM    348  HE1 PHE D 169      28.786  44.821  -4.884  1.00  0.14           H  
ATOM    349  HD1 PHE D 169      26.332  45.136  -4.712  1.00  0.13           H  
ATOM    350  HB3 PHE D 169      24.181  46.155  -7.549  1.00  0.03           H  
ATOM    351  HB2 PHE D 169      24.217  45.428  -5.907  1.00  0.03           H  
ATOM    352  HA  PHE D 169      24.558  48.390  -6.615  1.00  0.10           H  
ATOM    353  N   SER D 170      22.174  48.677  -5.984  1.00 -0.42           N  
ATOM    354  CA  SER D 170      20.736  48.789  -5.839  1.00 -0.02           C  
ATOM    355  C   SER D 170      20.104  48.916  -7.215  1.00  0.60           C  
ATOM    356  O   SER D 170      20.561  49.663  -8.082  1.00 -0.57           O  
ATOM    357  CB  SER D 170      20.365  49.985  -4.971  1.00  0.21           C  
ATOM    358  OG  SER D 170      21.519  50.597  -4.431  1.00 -0.65           O  
ATOM    359  H   SER D 170      22.685  49.445  -6.370  1.00  0.27           H  
ATOM    360  HG  SER D 170      21.263  51.338  -3.895  1.00  0.43           H  
ATOM    361  HB3 SER D 170      19.719  49.645  -4.148  1.00  0.04           H  
ATOM    362  HB2 SER D 170      19.822  50.719  -5.584  1.00  0.04           H  
ATOM    363  HA  SER D 170      20.357  47.876  -5.356  1.00  0.08           H  
TER     364      SER D 170                                                      
ATOM    365  N   THR D 201      27.143  53.891  -4.648  1.00 -0.42           N  
ATOM    366  CA  THR D 201      26.041  53.050  -5.094  1.00 -0.04           C  
ATOM    367  C   THR D 201      26.065  52.827  -6.616  1.00  0.60           C  
ATOM    368  O   THR D 201      26.000  53.774  -7.411  1.00 -0.57           O  
ATOM    369  CB  THR D 201      24.707  53.630  -4.611  1.00  0.37           C  
ATOM    370  OG1 THR D 201      24.530  53.279  -3.232  1.00 -0.68           O  
ATOM    371  CG2 THR D 201      23.528  52.970  -5.336  1.00 -0.24           C  
ATOM    372  H   THR D 201      27.313  54.760  -5.113  1.00  0.27           H  
ATOM    373 HNCA THR D 201      27.735  53.597  -3.871  1.00  0.00           H  
ATOM    374 HG22 THR D 201      22.699  52.822  -4.628  1.00  0.06           H  
ATOM    375 HG21 THR D 201      23.844  51.997  -5.739  1.00  0.06           H  
ATOM    376 HG23 THR D 201      23.195  53.618  -6.160  1.00  0.06           H  
ATOM    377  HG1 THR D 201      23.706  53.633  -2.919  1.00  0.41           H  
ATOM    378  HB  THR D 201      24.694  54.721  -4.753  1.00  0.00           H  
ATOM    379  HA  THR D 201      26.163  52.065  -4.621  1.00  0.10           H  
ATOM    380  N   TYR D 202      26.194  51.567  -7.008  1.00 -0.42           N  
ATOM    381  CA  TYR D 202      26.078  51.236  -8.396  1.00 -0.00           C  
ATOM    382  C   TYR D 202      24.596  51.333  -8.717  1.00  0.60           C  
ATOM    383  O   TYR D 202      23.763  50.753  -8.027  1.00 -0.57           O  
ATOM    384  CB  TYR D 202      26.645  49.849  -8.653  1.00 -0.02           C  
ATOM    385  CG  TYR D 202      28.112  49.821  -8.454  1.00 -0.00           C  
ATOM    386  CD1 TYR D 202      28.635  49.644  -7.200  1.00 -0.19           C  
ATOM    387  CD2 TYR D 202      28.989  50.029  -9.508  1.00 -0.19           C  
ATOM    388  CE1 TYR D 202      30.029  49.650  -6.977  1.00 -0.23           C  
ATOM    389  CE2 TYR D 202      30.389  50.040  -9.305  1.00 -0.23           C  
ATOM    390  CZ  TYR D 202      30.904  49.847  -8.033  1.00  0.32           C  
ATOM    391  OH  TYR D 202      32.269  49.834  -7.800  1.00 -0.56           O  
ATOM    392  H   TYR D 202      26.372  50.849  -6.335  1.00  0.27           H  
ATOM    393  HD2 TYR D 202      28.595  50.186 -10.505  1.00  0.17           H  
ATOM    394  HE2 TYR D 202      31.058  50.199 -10.143  1.00  0.17           H  
ATOM    395  HH  TYR D 202      32.431  49.689  -6.875  1.00  0.40           H  
ATOM    396  HE1 TYR D 202      30.416  49.500  -5.976  1.00  0.17           H  
ATOM    397  HD1 TYR D 202      27.964  49.496  -6.361  1.00  0.17           H  
ATOM    398  HB2 TYR D 202      26.419  49.556  -9.689  1.00  0.03           H  
ATOM    399  HB3 TYR D 202      26.176  49.136  -7.959  1.00  0.03           H  
ATOM    400  HA  TYR D 202      26.635  51.963  -9.005  1.00  0.09           H  
ATOM    401  N   SER D 203      24.274  52.128  -9.726  1.00 -0.42           N  
ATOM    402  CA  SER D 203      22.913  52.267 -10.188  1.00 -0.02           C  
ATOM    403  C   SER D 203      22.681  51.296 -11.343  1.00  0.60           C  
ATOM    404  O   SER D 203      23.021  51.572 -12.493  1.00 -0.57           O  
ATOM    405  CB  SER D 203      22.639  53.728 -10.594  1.00  0.21           C  
ATOM    406  OG  SER D 203      23.317  54.662  -9.740  1.00 -0.65           O  
ATOM    407  H   SER D 203      24.996  52.648 -10.182  1.00  0.27           H  
ATOM    408  HG  SER D 203      23.123  55.548 -10.023  1.00  0.43           H  
ATOM    409  HB3 SER D 203      21.557  53.915 -10.536  1.00  0.04           H  
ATOM    410  HB2 SER D 203      22.982  53.879 -11.628  1.00  0.04           H  
ATOM    411  HA  SER D 203      22.229  52.003  -9.368  1.00  0.08           H  
ATOM    412  N   ILE D 204      22.120  50.143 -11.024  1.00 -0.42           N  
ATOM    413  CA  ILE D 204      21.660  49.222 -12.061  1.00 -0.06           C  
ATOM    414  C   ILE D 204      20.136  49.413 -12.404  1.00  0.60           C  
ATOM    415  O   ILE D 204      19.241  49.187 -11.577  1.00 -0.57           O  
ATOM    416  CB  ILE D 204      22.011  47.779 -11.658  1.00  0.13           C  
ATOM    417  CG1 ILE D 204      23.355  47.761 -10.970  1.00 -0.04           C  
ATOM    418  CG2 ILE D 204      22.057  46.870 -12.855  1.00 -0.32           C  
ATOM    419  CD1 ILE D 204      23.197  47.996  -9.548  1.00 -0.07           C  
ATOM    420  H   ILE D 204      22.009  49.898 -10.061  1.00  0.27           H  
ATOM    421 HG23 ILE D 204      21.072  46.857 -13.343  1.00  0.09           H  
ATOM    422 HG22 ILE D 204      22.320  45.852 -12.532  1.00  0.09           H  
ATOM    423 HG21 ILE D 204      22.813  47.236 -13.565  1.00  0.09           H  
ATOM    424 HD13 ILE D 204      22.735  48.981  -9.388  1.00  0.02           H  
ATOM    425 HD12 ILE D 204      24.183  47.970  -9.060  1.00  0.02           H  
ATOM    426 HD11 ILE D 204      22.554  47.215  -9.117  1.00  0.02           H  
ATOM    427 HG13 ILE D 204      23.993  48.548 -11.399  1.00  0.02           H  
ATOM    428 HG12 ILE D 204      23.829  46.780 -11.125  1.00  0.02           H  
ATOM    429  HB  ILE D 204      21.244  47.410 -10.962  1.00  0.02           H  
ATOM    430  HA  ILE D 204      22.222  49.452 -12.978  1.00  0.09           H  
TER     431      ILE D 204                                                      
ATOM    432  N   THR D 234      28.211  42.025 -14.531  1.00 -0.42           N  
ATOM    433  CA  THR D 234      28.616  43.385 -14.221  1.00 -0.04           C  
ATOM    434  C   THR D 234      29.312  43.514 -12.861  1.00  0.60           C  
ATOM    435  O   THR D 234      30.301  44.237 -12.725  1.00 -0.57           O  
ATOM    436  CB  THR D 234      27.381  44.277 -14.295  1.00  0.37           C  
ATOM    437  OG1 THR D 234      27.036  44.471 -15.670  1.00 -0.68           O  
ATOM    438  CG2 THR D 234      27.694  45.672 -13.806  1.00 -0.24           C  
ATOM    439  H   THR D 234      27.236  41.839 -14.653  1.00  0.27           H  
ATOM    440 HNCA THR D 234      28.902  41.280 -14.621  1.00  0.00           H  
ATOM    441 HG22 THR D 234      27.165  46.407 -14.431  1.00  0.06           H  
ATOM    442 HG21 THR D 234      28.778  45.849 -13.871  1.00  0.06           H  
ATOM    443 HG23 THR D 234      27.367  45.776 -12.761  1.00  0.06           H  
ATOM    444  HG1 THR D 234      26.267  45.026 -15.728  1.00  0.41           H  
ATOM    445  HB  THR D 234      26.553  43.830 -13.726  1.00  0.00           H  
ATOM    446  HA  THR D 234      29.330  43.713 -14.991  1.00  0.10           H  
ATOM    447  N   MET D 235      28.777  42.799 -11.878  1.00 -0.42           N  
ATOM    448  CA  MET D 235      29.317  42.754 -10.521  1.00 -0.02           C  
ATOM    449  C   MET D 235      30.659  42.040 -10.455  1.00  0.60           C  
ATOM    450  O   MET D 235      31.542  42.399  -9.666  1.00 -0.57           O  
ATOM    451  CB  MET D 235      28.323  42.076  -9.575  1.00  0.03           C  
ATOM    452  CG  MET D 235      27.184  42.991  -9.167  1.00  0.00           C  
ATOM    453  SD  MET D 235      26.071  42.333  -7.942  1.00 -0.27           S  
ATOM    454  CE  MET D 235      24.974  41.361  -8.986  1.00 -0.05           C  
ATOM    455  H   MET D 235      27.958  42.261 -12.078  1.00  0.27           H  
ATOM    456  HE3 MET D 235      24.479  42.022  -9.713  1.00  0.07           H  
ATOM    457  HE2 MET D 235      24.214  40.868  -8.361  1.00  0.07           H  
ATOM    458  HE1 MET D 235      25.558  40.599  -9.522  1.00  0.07           H  
ATOM    459 LPD2 MET D 235      25.736  42.826  -7.617  1.00  0.00          LP  
ATOM    460 LPD1 MET D 235      26.397  41.945  -7.490  1.00  0.00          LP  
ATOM    461  HG3 MET D 235      26.597  43.223 -10.068  1.00  0.04           H  
ATOM    462  HG2 MET D 235      27.621  43.917  -8.765  1.00  0.04           H  
ATOM    463  HB3 MET D 235      28.860  41.758  -8.669  1.00  0.02           H  
ATOM    464  HB2 MET D 235      27.902  41.194 -10.080  1.00  0.02           H  
ATOM    465  HA  MET D 235      29.467  43.790 -10.183  1.00  0.09           H  
TER     466      MET D 235                                                      
ATOM    467  N   GLY D 237      32.826  41.949 -13.034  1.00 -0.42           N  
ATOM    468  CA  GLY D 237      33.711  42.915 -13.659  1.00 -0.03           C  
ATOM    469  C   GLY D 237      34.070  44.028 -12.700  1.00  0.60           C  
ATOM    470  O   GLY D 237      35.235  44.390 -12.531  1.00 -0.57           O  
ATOM    471  H   GLY D 237      31.960  41.736 -13.486  1.00  0.27           H  
ATOM    472 HNCA GLY D 237      33.081  41.498 -12.155  1.00  0.00           H  
ATOM    473  HA2 GLY D 237      33.209  43.346 -14.537  1.00  0.07           H  
ATOM    474  HA3 GLY D 237      34.632  42.405 -13.977  1.00  0.07           H  
ATOM    475  N   VAL D 238      33.049  44.557 -12.047  1.00 -0.42           N  
ATOM    476  CA  VAL D 238      33.275  45.618 -11.110  1.00 -0.09           C  
ATOM    477  C   VAL D 238      34.187  45.185 -10.018  1.00  0.60           C  
ATOM    478  O   VAL D 238      35.106  45.896  -9.771  1.00 -0.57           O  
ATOM    479  CB  VAL D 238      32.007  46.163 -10.507  1.00  0.30           C  
ATOM    480  CG1 VAL D 238      32.374  47.055  -9.348  1.00 -0.32           C  
ATOM    481  CG2 VAL D 238      31.153  46.918 -11.585  1.00 -0.32           C  
ATOM    482  H   VAL D 238      32.122  44.218 -12.206  1.00  0.27           H  
ATOM    483 HG23 VAL D 238      31.733  47.761 -11.988  1.00  0.08           H  
ATOM    484 HG22 VAL D 238      30.230  47.297 -11.122  1.00  0.08           H  
ATOM    485 HG21 VAL D 238      30.897  46.226 -12.401  1.00  0.08           H  
ATOM    486 HG13 VAL D 238      32.918  46.469  -8.592  1.00  0.08           H  
ATOM    487 HG12 VAL D 238      31.459  47.471  -8.901  1.00  0.08           H  
ATOM    488 HG11 VAL D 238      33.013  47.876  -9.705  1.00  0.08           H  
ATOM    489  HB  VAL D 238      31.408  45.323 -10.125  1.00 -0.03           H  
ATOM    490  HA  VAL D 238      33.763  46.438 -11.657  1.00  0.10           H  
ATOM    491  N   THR D 239      33.970  44.025  -9.406  1.00 -0.42           N  
ATOM    492  CA  THR D 239      34.763  43.597  -8.235  1.00 -0.04           C  
ATOM    493  C   THR D 239      36.235  43.200  -8.444  1.00  0.60           C  
ATOM    494  O   THR D 239      37.107  43.522  -7.623  1.00 -0.57           O  
ATOM    495  CB  THR D 239      34.089  42.449  -7.514  1.00  0.37           C  
ATOM    496  OG1 THR D 239      33.535  41.539  -8.471  1.00 -0.68           O  
ATOM    497  CG2 THR D 239      32.918  42.964  -6.758  1.00 -0.24           C  
ATOM    498  H   THR D 239      33.248  43.424  -9.749  1.00  0.27           H  
ATOM    499 HG22 THR D 239      32.093  42.239  -6.821  1.00  0.06           H  
ATOM    500 HG21 THR D 239      32.597  43.924  -7.189  1.00  0.06           H  
ATOM    501 HG23 THR D 239      33.197  43.110  -5.704  1.00  0.06           H  
ATOM    502  HG1 THR D 239      33.113  40.820  -8.016  1.00  0.41           H  
ATOM    503  HB  THR D 239      34.804  41.942  -6.849  1.00  0.00           H  
ATOM    504  HA  THR D 239      34.772  44.461  -7.555  1.00  0.10           H  
ATOM    505  N   THR D 240      36.492  42.470  -9.523  1.00 -0.42           N  
ATOM    506  CA  THR D 240      37.832  41.971  -9.884  1.00 -0.04           C  
ATOM    507  C   THR D 240      39.048  42.516  -9.128  1.00  0.60           C  
ATOM    508  O   THR D 240      39.730  41.773  -8.449  1.00 -0.57           O  
ATOM    509  CB  THR D 240      38.053  42.113 -11.404  1.00  0.37           C  
ATOM    510  OG1 THR D 240      37.174  43.120 -11.934  1.00 -0.68           O  
ATOM    511  CG2 THR D 240      37.560  40.887 -12.078  1.00 -0.24           C  
ATOM    512  H   THR D 240      35.729  42.244 -10.129  1.00  0.27           H  
ATOM    513 HG22 THR D 240      37.068  41.161 -13.023  1.00  0.06           H  
ATOM    514 HG21 THR D 240      36.839  40.374 -11.425  1.00  0.06           H  
ATOM    515 HG23 THR D 240      38.407  40.217 -12.286  1.00  0.06           H  
ATOM    516  HG1 THR D 240      37.315  43.203 -12.870  1.00  0.41           H  
ATOM    517  HB  THR D 240      39.109  42.321 -11.629  1.00  0.00           H  
ATOM    518  HA  THR D 240      37.810  40.894  -9.661  1.00  0.10           H  
ATOM    519  N   CYS D 241      39.303  43.808  -9.254  1.00 -0.42           N  
ATOM    520  CA  CYS D 241      40.503  44.426  -8.719  1.00  0.02           C  
ATOM    521  C   CYS D 241      40.554  44.408  -7.209  1.00  0.60           C  
ATOM    522  O   CYS D 241      41.623  44.603  -6.609  1.00 -0.57           O  
ATOM    523  CB  CYS D 241      40.575  45.858  -9.199  1.00 -0.12           C  
ATOM    524  SG  CYS D 241      39.548  46.099 -10.664  1.00 -0.31           S  
ATOM    525  H   CYS D 241      38.642  44.382  -9.737  1.00  0.27           H  
ATOM    526  HG  CYS D 241      38.589  45.879 -10.442  1.00  0.19           H  
ATOM    527 LPG2 CYS D 241      39.764  45.691 -11.162  1.00  0.00          LP  
ATOM    528 LPG1 CYS D 241      39.591  46.746 -10.867  1.00  0.00          LP  
ATOM    529  HB3 CYS D 241      41.618  46.103  -9.447  1.00  0.11           H  
ATOM    530  HB2 CYS D 241      40.222  46.524  -8.398  1.00  0.11           H  
ATOM    531  HA  CYS D 241      41.375  43.874  -9.100  1.00  0.11           H  
ATOM    532  N   LEU D 242      39.397  44.194  -6.593  1.00 -0.42           N  
ATOM    533  CA  LEU D 242      39.350  43.979  -5.155  1.00 -0.05           C  
ATOM    534  C   LEU D 242      39.892  42.580  -4.866  1.00  0.60           C  
ATOM    535  O   LEU D 242      40.611  42.368  -3.882  1.00 -0.57           O  
ATOM    536  CB  LEU D 242      37.910  44.121  -4.616  1.00 -0.11           C  
ATOM    537  CG  LEU D 242      37.162  45.467  -4.509  1.00  0.35           C  
ATOM    538  CD1 LEU D 242      35.716  45.230  -4.093  1.00 -0.41           C  
ATOM    539  CD2 LEU D 242      37.813  46.462  -3.544  1.00 -0.41           C  
ATOM    540  H   LEU D 242      38.549  44.181  -7.123  1.00  0.27           H  
ATOM    541 HD13 LEU D 242      35.215  44.607  -4.848  1.00  0.10           H  
ATOM    542 HD12 LEU D 242      35.195  46.195  -4.010  1.00  0.10           H  
ATOM    543 HD11 LEU D 242      35.694  44.717  -3.120  1.00  0.10           H  
ATOM    544 HD23 LEU D 242      37.836  46.030  -2.533  1.00  0.10           H  
ATOM    545 HD22 LEU D 242      37.230  47.395  -3.531  1.00  0.10           H  
ATOM    546 HD21 LEU D 242      38.840  46.676  -3.875  1.00  0.10           H  
ATOM    547  HG  LEU D 242      37.163  45.925  -5.509  1.00 -0.04           H  
ATOM    548  HB3 LEU D 242      37.930  43.708  -3.597  1.00  0.05           H  
ATOM    549  HB2 LEU D 242      37.286  43.482  -5.258  1.00  0.05           H  
ATOM    550  HA  LEU D 242      39.987  44.725  -4.658  1.00  0.09           H  
ATOM    551  N   ARG D 243      39.583  41.661  -5.781  1.00 -0.35           N  
ATOM    552  CA  ARG D 243      39.670  40.225  -5.530  1.00 -0.26           C  
ATOM    553  C   ARG D 243      40.501  39.379  -6.520  1.00  0.73           C  
ATOM    554  O   ARG D 243      40.060  38.296  -6.924  1.00 -0.59           O  
ATOM    555  CB  ARG D 243      38.254  39.643  -5.433  1.00 -0.00           C  
ATOM    556  CG  ARG D 243      37.311  40.083  -6.531  1.00  0.04           C  
ATOM    557  CD  ARG D 243      36.000  39.352  -6.499  1.00  0.05           C  
ATOM    558  NE  ARG D 243      35.395  39.324  -7.818  1.00 -0.53           N  
ATOM    559  CZ  ARG D 243      35.631  38.381  -8.727  1.00  0.81           C  
ATOM    560  NH1 ARG D 243      36.468  37.373  -8.441  1.00 -0.86           N  
ATOM    561  NH2 ARG D 243      35.022  38.445  -9.921  1.00 -0.86           N  
ATOM    562  H   ARG D 243      39.277  41.969  -6.682  1.00  0.27           H  
ATOM    563 HH21 ARG D 243      34.377  39.220 -10.129  1.00  0.45           H  
ATOM    564 HH22 ARG D 243      35.200  37.719 -10.629  1.00  0.45           H  
ATOM    565 HH11 ARG D 243      36.926  37.330  -7.520  1.00  0.45           H  
ATOM    566 HH12 ARG D 243      36.652  36.642  -9.143  1.00  0.45           H  
ATOM    567  HE  ARG D 243      34.742  40.081  -8.066  1.00  0.35           H  
ATOM    568  HD3 ARG D 243      35.320  39.861  -5.801  1.00  0.07           H  
ATOM    569  HD2 ARG D 243      36.170  38.320  -6.158  1.00  0.07           H  
ATOM    570  HG3 ARG D 243      37.792  39.899  -7.503  1.00  0.03           H  
ATOM    571  HG2 ARG D 243      37.116  41.160  -6.417  1.00  0.03           H  
ATOM    572  HB3 ARG D 243      37.823  39.950  -4.468  1.00  0.03           H  
ATOM    573  HB2 ARG D 243      38.332  38.546  -5.468  1.00  0.03           H  
ATOM    574  HA  ARG D 243      40.151  40.112  -4.547  1.00  0.16           H  
TER     575      ARG D 243                                                      
ATOM    576  N   GLN D 247      47.809  44.570  -9.046  1.00 -0.42           N  
ATOM    577  CA  GLN D 247      47.955  45.753  -9.917  1.00 -0.00           C  
ATOM    578  C   GLN D 247      48.082  47.038  -9.072  1.00  0.60           C  
ATOM    579  O   GLN D 247      49.209  47.515  -8.783  1.00 -0.57           O  
ATOM    580  CB  GLN D 247      46.773  45.861 -10.883  1.00 -0.00           C  
ATOM    581  CG  GLN D 247      45.419  45.807 -10.184  1.00 -0.06           C  
ATOM    582  CD  GLN D 247      44.346  45.053 -10.983  1.00  0.70           C  
ATOM    583  OE1 GLN D 247      43.152  45.107 -10.650  1.00 -0.61           O  
ATOM    584  NE2 GLN D 247      44.769  44.361 -12.047  1.00 -0.94           N  
ATOM    585  H   GLN D 247      46.928  44.096  -9.058  1.00  0.27           H  
ATOM    586 HNCA GLN D 247      48.576  44.249  -8.455  1.00  0.00           H  
ATOM    587 HE21 GLN D 247      45.740  44.354 -12.285  1.00  0.43           H  
ATOM    588 HE22 GLN D 247      44.114  43.851 -12.604  1.00  0.43           H  
ATOM    589  HG3 GLN D 247      45.071  46.837 -10.020  1.00  0.04           H  
ATOM    590  HG2 GLN D 247      45.548  45.305  -9.214  1.00  0.04           H  
ATOM    591  HB3 GLN D 247      46.830  45.028 -11.600  1.00  0.02           H  
ATOM    592  HB2 GLN D 247      46.849  46.816 -11.424  1.00  0.02           H  
ATOM    593  HA  GLN D 247      48.875  45.635 -10.508  1.00  0.09           H  
ATOM    594  N   LEU D 248      46.926  47.578  -8.672  1.00 -0.42           N  
ATOM    595  CA  LEU D 248      46.828  48.607  -7.628  1.00 -0.05           C  
ATOM    596  C   LEU D 248      46.819  47.792  -6.310  1.00  0.60           C  
ATOM    597  O   LEU D 248      47.819  47.133  -6.011  1.00 -0.57           O  
ATOM    598  CB  LEU D 248      45.574  49.496  -7.868  1.00 -0.11           C  
ATOM    599  CG  LEU D 248      45.025  49.596  -9.339  1.00  0.35           C  
ATOM    600  CD1 LEU D 248      43.596  48.982  -9.515  1.00 -0.41           C  
ATOM    601  CD2 LEU D 248      45.112  51.008 -10.018  1.00 -0.41           C  
ATOM    602  H   LEU D 248      46.082  47.264  -9.107  1.00  0.27           H  
ATOM    603 HD13 LEU D 248      43.621  47.914  -9.254  1.00  0.10           H  
ATOM    604 HD12 LEU D 248      43.274  49.096 -10.561  1.00  0.10           H  
ATOM    605 HD11 LEU D 248      42.889  49.505  -8.854  1.00  0.10           H  
ATOM    606 HD23 LEU D 248      44.525  51.732  -9.434  1.00  0.10           H  
ATOM    607 HD22 LEU D 248      44.710  50.949 -11.040  1.00  0.10           H  
ATOM    608 HD21 LEU D 248      46.162  51.333 -10.056  1.00  0.10           H  
ATOM    609  HG  LEU D 248      45.697  48.954  -9.928  1.00 -0.04           H  
ATOM    610  HB3 LEU D 248      45.825  50.516  -7.540  1.00  0.05           H  
ATOM    611  HB2 LEU D 248      44.763  49.098  -7.240  1.00  0.05           H  
ATOM    612  HA  LEU D 248      47.715  49.257  -7.647  1.00  0.09           H  
ATOM    613  N   ASN D 249      45.758  47.893  -5.508  1.00 -0.42           N  
ATOM    614  CA  ASN D 249      45.157  46.737  -4.788  1.00  0.01           C  
ATOM    615  C   ASN D 249      43.688  46.999  -4.455  1.00  0.60           C  
ATOM    616  O   ASN D 249      42.973  46.108  -3.975  1.00 -0.57           O  
ATOM    617  CB  ASN D 249      45.919  46.107  -3.565  1.00 -0.20           C  
ATOM    618  CG  ASN D 249      47.037  46.961  -2.983  1.00  0.71           C  
ATOM    619  OD1 ASN D 249      46.851  48.148  -2.711  1.00 -0.59           O  
ATOM    620  ND2 ASN D 249      48.198  46.325  -2.731  1.00 -0.92           N  
ATOM    621  H   ASN D 249      45.344  48.795  -5.384  1.00  0.27           H  
ATOM    622 HD21 ASN D 249      48.286  45.348  -2.927  1.00  0.42           H  
ATOM    623 HD22 ASN D 249      48.972  46.830  -2.348  1.00  0.42           H  
ATOM    624  HB3 ASN D 249      46.356  45.152  -3.893  1.00  0.08           H  
ATOM    625  HB2 ASN D 249      45.185  45.919  -2.768  1.00  0.08           H  
ATOM    626  HA  ASN D 249      45.150  45.932  -5.538  1.00  0.10           H  
ATOM    627  N   ALA D 250      43.270  48.238  -4.742  1.00 -0.42           N  
ATOM    628  CA  ALA D 250      41.871  48.703  -4.691  1.00  0.03           C  
ATOM    629  C   ALA D 250      41.175  48.550  -3.318  1.00  0.60           C  
ATOM    630  O   ALA D 250      40.689  47.472  -2.959  1.00 -0.57           O  
ATOM    631  CB  ALA D 250      41.050  48.088  -5.835  1.00 -0.18           C  
ATOM    632  H   ALA D 250      43.965  48.904  -5.014  1.00  0.27           H  
ATOM    633  HB3 ALA D 250      41.063  46.992  -5.747  1.00  0.06           H  
ATOM    634  HB2 ALA D 250      41.487  48.384  -6.800  1.00  0.06           H  
ATOM    635  HB1 ALA D 250      40.012  48.448  -5.777  1.00  0.06           H  
ATOM    636  HA  ALA D 250      41.908  49.785  -4.883  1.00  0.08           H  
ATOM    637  N   ASP D 251      41.146  49.654  -2.567  1.00 -0.52           N  
ATOM    638  CA  ASP D 251      40.694  49.657  -1.185  1.00  0.04           C  
ATOM    639  C   ASP D 251      39.200  49.744  -1.094  1.00  0.54           C  
ATOM    640  O   ASP D 251      38.672  49.685   0.015  1.00 -0.58           O  
ATOM    641  CB  ASP D 251      41.257  50.860  -0.426  1.00 -0.03           C  
ATOM    642  CG  ASP D 251      42.769  50.767  -0.178  1.00  0.80           C  
ATOM    643  OD1 ASP D 251      43.500  50.259  -1.076  1.00 -0.80           O  
ATOM    644  OD2 ASP D 251      43.316  51.195   0.890  1.00 -0.80           O  
ATOM    645  H   ASP D 251      41.448  50.516  -2.973  1.00  0.29           H  
ATOM    646  HB3 ASP D 251      40.747  50.929   0.546  1.00 -0.01           H  
ATOM    647  HB2 ASP D 251      41.054  51.769  -1.012  1.00 -0.01           H  
ATOM    648  HA  ASP D 251      41.035  48.728  -0.704  1.00  0.09           H  
ATOM    649  N   LEU D 252      38.513  49.911  -2.229  1.00 -0.42           N  
ATOM    650  CA  LEU D 252      37.089  50.179  -2.193  1.00 -0.05           C  
ATOM    651  C   LEU D 252      36.928  51.512  -1.484  1.00  0.60           C  
ATOM    652  O   LEU D 252      36.049  52.279  -1.818  1.00 -0.57           O  
ATOM    653  CB  LEU D 252      36.352  49.047  -1.469  1.00 -0.11           C  
ATOM    654  CG  LEU D 252      34.872  49.038  -1.108  1.00  0.35           C  
ATOM    655  CD1 LEU D 252      34.010  48.918  -2.305  1.00 -0.41           C  
ATOM    656  CD2 LEU D 252      34.604  47.861  -0.236  1.00 -0.41           C  
ATOM    657  H   LEU D 252      38.985  49.851  -3.109  1.00  0.27           H  
ATOM    658 HD13 LEU D 252      34.187  49.775  -2.972  1.00  0.10           H  
ATOM    659 HD12 LEU D 252      32.954  48.905  -1.997  1.00  0.10           H  
ATOM    660 HD11 LEU D 252      34.248  47.985  -2.836  1.00  0.10           H  
ATOM    661 HD23 LEU D 252      34.854  46.938  -0.779  1.00  0.10           H  
ATOM    662 HD22 LEU D 252      33.540  47.846   0.043  1.00  0.10           H  
ATOM    663 HD21 LEU D 252      35.220  47.930   0.673  1.00  0.10           H  
ATOM    664  HG  LEU D 252      34.625  49.967  -0.573  1.00 -0.04           H  
ATOM    665  HB3 LEU D 252      36.884  48.919  -0.515  1.00  0.05           H  
ATOM    666  HB2 LEU D 252      36.503  48.156  -2.096  1.00  0.05           H  
ATOM    667  HA  LEU D 252      36.696  50.257  -3.218  1.00  0.09           H  
ATOM    668  N   ARG D 253      37.785  51.779  -0.498  1.00 -0.35           N  
ATOM    669  CA  ARG D 253      37.960  53.127   0.017  1.00 -0.26           C  
ATOM    670  C   ARG D 253      38.739  53.881  -1.024  1.00  0.73           C  
ATOM    671  O   ARG D 253      38.247  54.871  -1.553  1.00 -0.59           O  
ATOM    672  CB  ARG D 253      38.718  53.193   1.326  1.00 -0.00           C  
ATOM    673  CG  ARG D 253      39.158  54.607   1.643  1.00  0.04           C  
ATOM    674  CD  ARG D 253      38.376  55.292   2.739  1.00  0.05           C  
ATOM    675  NE  ARG D 253      38.977  54.995   4.035  1.00 -0.53           N  
ATOM    676  CZ  ARG D 253      38.677  53.930   4.786  1.00  0.81           C  
ATOM    677  NH1 ARG D 253      37.756  53.067   4.394  1.00 -0.86           N  
ATOM    678  NH2 ARG D 253      39.280  53.729   5.947  1.00 -0.86           N  
ATOM    679  H   ARG D 253      38.321  51.033  -0.103  1.00  0.27           H  
ATOM    680 HH21 ARG D 253      39.989  54.397   6.281  1.00  0.45           H  
ATOM    681 HH22 ARG D 253      39.040  52.905   6.516  1.00  0.45           H  
ATOM    682 HH11 ARG D 253      37.261  53.211   3.502  1.00  0.45           H  
ATOM    683 HH12 ARG D 253      37.533  52.250   4.980  1.00  0.45           H  
ATOM    684  HE  ARG D 253      39.682  55.652   4.397  1.00  0.35           H  
ATOM    685  HD3 ARG D 253      37.337  54.931   2.727  1.00  0.07           H  
ATOM    686  HD2 ARG D 253      38.388  56.379   2.571  1.00  0.07           H  
ATOM    687  HG3 ARG D 253      39.059  55.208   0.727  1.00  0.03           H  
ATOM    688  HG2 ARG D 253      40.215  54.575   1.948  1.00  0.03           H  
ATOM    689  HB3 ARG D 253      39.607  52.549   1.257  1.00  0.03           H  
ATOM    690  HB2 ARG D 253      38.066  52.832   2.135  1.00  0.03           H  
ATOM    691  HA  ARG D 253      36.972  53.588   0.159  1.00  0.16           H  
ATOM    692  N   LYS D 254      39.945  53.419  -1.343  1.00 -0.35           N  
ATOM    693  CA  LYS D 254      40.699  54.058  -2.412  1.00 -0.24           C  
ATOM    694  C   LYS D 254      39.697  54.386  -3.523  1.00  0.73           C  
ATOM    695  O   LYS D 254      39.609  55.546  -3.953  1.00 -0.59           O  
ATOM    696  CB  LYS D 254      41.840  53.172  -2.922  1.00 -0.01           C  
ATOM    697  CG  LYS D 254      43.228  53.774  -2.801  1.00  0.02           C  
ATOM    698  CD  LYS D 254      44.229  52.967  -3.626  1.00 -0.05           C  
ATOM    699  CE  LYS D 254      45.707  53.319  -3.281  1.00 -0.01           C  
ATOM    700  NZ  LYS D 254      46.281  52.927  -1.942  1.00 -0.39           N  
ATOM    701  H   LYS D 254      40.331  52.638  -0.852  1.00  0.27           H  
ATOM    702  HZ3 LYS D 254      45.754  53.372  -1.207  1.00  0.34           H  
ATOM    703  HZ2 LYS D 254      47.244  53.221  -1.890  1.00  0.34           H  
ATOM    704  HZ1 LYS D 254      46.229  51.926  -1.834  1.00  0.34           H  
ATOM    705  HE3 LYS D 254      45.800  54.412  -3.359  1.00  0.11           H  
ATOM    706  HE2 LYS D 254      46.335  52.842  -4.048  1.00  0.11           H  
ATOM    707  HD3 LYS D 254      44.057  53.175  -4.692  1.00  0.06           H  
ATOM    708  HD2 LYS D 254      44.066  51.897  -3.430  1.00  0.06           H  
ATOM    709  HG3 LYS D 254      43.537  53.765  -1.745  1.00  0.01           H  
ATOM    710  HG2 LYS D 254      43.207  54.811  -3.168  1.00  0.01           H  
ATOM    711  HB3 LYS D 254      41.654  52.956  -3.984  1.00  0.04           H  
ATOM    712  HB2 LYS D 254      41.825  52.233  -2.349  1.00  0.04           H  
ATOM    713  HA  LYS D 254      41.136  54.993  -2.033  1.00  0.14           H  
ATOM    714  N   LEU D 255      38.901  53.391  -3.935  1.00 -0.42           N  
ATOM    715  CA  LEU D 255      37.922  53.612  -4.996  1.00 -0.05           C  
ATOM    716  C   LEU D 255      37.065  54.838  -4.735  1.00  0.60           C  
ATOM    717  O   LEU D 255      36.940  55.697  -5.605  1.00 -0.57           O  
ATOM    718  CB  LEU D 255      37.018  52.392  -5.210  1.00 -0.11           C  
ATOM    719  CG  LEU D 255      36.079  52.304  -6.450  1.00  0.35           C  
ATOM    720  CD1 LEU D 255      34.716  53.031  -6.332  1.00 -0.41           C  
ATOM    721  CD2 LEU D 255      36.802  52.690  -7.748  1.00 -0.41           C  
ATOM    722  H   LEU D 255      38.978  52.488  -3.512  1.00  0.27           H  
ATOM    723 HD13 LEU D 255      34.142  52.602  -5.497  1.00  0.10           H  
ATOM    724 HD12 LEU D 255      34.151  52.906  -7.268  1.00  0.10           H  
ATOM    725 HD11 LEU D 255      34.886  54.102  -6.147  1.00  0.10           H  
ATOM    726 HD23 LEU D 255      37.161  53.727  -7.673  1.00  0.10           H  
ATOM    727 HD22 LEU D 255      36.106  52.604  -8.595  1.00  0.10           H  
ATOM    728 HD21 LEU D 255      37.657  52.016  -7.906  1.00  0.10           H  
ATOM    729  HG  LEU D 255      35.830  51.237  -6.545  1.00 -0.04           H  
ATOM    730  HB3 LEU D 255      36.373  52.320  -4.322  1.00  0.05           H  
ATOM    731  HB2 LEU D 255      37.680  51.515  -5.255  1.00  0.05           H  
ATOM    732  HA  LEU D 255      38.481  53.784  -5.927  1.00  0.09           H  
ATOM    733  N   ALA D 256      36.474  54.917  -3.548  1.00 -0.42           N  
ATOM    734  CA  ALA D 256      35.511  55.976  -3.275  1.00  0.03           C  
ATOM    735  C   ALA D 256      36.157  57.361  -3.373  1.00  0.60           C  
ATOM    736  O   ALA D 256      35.794  58.174  -4.239  1.00 -0.57           O  
ATOM    737  CB  ALA D 256      34.833  55.758  -1.928  1.00 -0.18           C  
ATOM    738  H   ALA D 256      36.691  54.247  -2.838  1.00  0.27           H  
ATOM    739  HB3 ALA D 256      35.592  55.755  -1.132  1.00  0.06           H  
ATOM    740  HB2 ALA D 256      34.306  54.793  -1.935  1.00  0.06           H  
ATOM    741  HB1 ALA D 256      34.112  56.568  -1.745  1.00  0.06           H  
ATOM    742  HA  ALA D 256      34.731  55.923  -4.049  1.00  0.08           H  
ATOM    743  N   VAL D 257      37.145  57.600  -2.513  1.00 -0.42           N  
ATOM    744  CA  VAL D 257      37.805  58.895  -2.429  1.00 -0.09           C  
ATOM    745  C   VAL D 257      38.240  59.409  -3.787  1.00  0.60           C  
ATOM    746  O   VAL D 257      38.184  60.601  -4.048  1.00 -0.57           O  
ATOM    747  CB  VAL D 257      39.021  58.857  -1.508  1.00  0.30           C  
ATOM    748  CG1 VAL D 257      40.191  58.150  -2.185  1.00 -0.32           C  
ATOM    749  CG2 VAL D 257      39.422  60.262  -1.110  1.00 -0.32           C  
ATOM    750  H   VAL D 257      37.444  56.865  -1.904  1.00  0.27           H  
ATOM    751 HG23 VAL D 257      39.682  60.838  -2.010  1.00  0.08           H  
ATOM    752 HG22 VAL D 257      40.292  60.219  -0.439  1.00  0.08           H  
ATOM    753 HG21 VAL D 257      38.583  60.750  -0.592  1.00  0.08           H  
ATOM    754 HG13 VAL D 257      39.905  57.115  -2.424  1.00  0.08           H  
ATOM    755 HG12 VAL D 257      41.057  58.144  -1.507  1.00  0.08           H  
ATOM    756 HG11 VAL D 257      40.454  58.681  -3.112  1.00  0.08           H  
ATOM    757  HB  VAL D 257      38.753  58.297  -0.600  1.00 -0.03           H  
ATOM    758  HA  VAL D 257      37.080  59.608  -2.010  1.00  0.10           H  
ATOM    759  N   ASN D 258      38.677  58.502  -4.646  1.00 -0.42           N  
ATOM    760  CA  ASN D 258      39.084  58.864  -5.992  1.00  0.01           C  
ATOM    761  C   ASN D 258      37.917  59.123  -6.952  1.00  0.60           C  
ATOM    762  O   ASN D 258      38.003  59.928  -7.885  1.00 -0.57           O  
ATOM    763  CB  ASN D 258      39.949  57.754  -6.546  1.00 -0.20           C  
ATOM    764  CG  ASN D 258      41.358  58.117  -6.553  1.00  0.71           C  
ATOM    765  OD1 ASN D 258      42.064  57.854  -5.604  1.00 -0.59           O  
ATOM    766  ND2 ASN D 258      41.791  58.759  -7.616  1.00 -0.92           N  
ATOM    767  H   ASN D 258      38.728  57.545  -4.361  1.00  0.27           H  
ATOM    768 HD21 ASN D 258      41.161  58.972  -8.363  1.00  0.42           H  
ATOM    769 HD22 ASN D 258      42.750  59.035  -7.678  1.00  0.42           H  
ATOM    770  HB3 ASN D 258      39.633  57.537  -7.577  1.00  0.08           H  
ATOM    771  HB2 ASN D 258      39.816  56.856  -5.925  1.00  0.08           H  
ATOM    772  HA  ASN D 258      39.681  59.786  -5.930  1.00  0.10           H  
ATOM    773  N   MET D 259      36.824  58.430  -6.720  1.00 -0.42           N  
ATOM    774  CA  MET D 259      35.787  58.437  -7.687  1.00 -0.02           C  
ATOM    775  C   MET D 259      34.851  59.583  -7.451  1.00  0.60           C  
ATOM    776  O   MET D 259      34.231  60.077  -8.394  1.00 -0.57           O  
ATOM    777  CB  MET D 259      35.068  57.111  -7.628  1.00  0.03           C  
ATOM    778  CG  MET D 259      35.724  56.115  -8.533  1.00  0.00           C  
ATOM    779  SD  MET D 259      36.062  56.927 -10.105  1.00 -0.27           S  
ATOM    780  CE  MET D 259      34.229  56.796 -10.894  1.00 -0.05           C  
ATOM    781  H   MET D 259      36.725  57.906  -5.874  1.00  0.27           H  
ATOM    782  HE3 MET D 259      33.944  55.738 -10.984  1.00  0.07           H  
ATOM    783  HE2 MET D 259      34.224  57.263 -11.890  1.00  0.07           H  
ATOM    784  HE1 MET D 259      33.511  57.315 -10.242  1.00  0.07           H  
ATOM    785 LPD2 MET D 259      36.524  56.592 -10.473  1.00  0.00          LP  
ATOM    786 LPD1 MET D 259      36.261  57.571 -10.024  1.00  0.00          LP  
ATOM    787  HG3 MET D 259      35.054  55.258  -8.693  1.00  0.04           H  
ATOM    788  HG2 MET D 259      36.665  55.766  -8.084  1.00  0.04           H  
ATOM    789  HB3 MET D 259      34.023  57.252  -7.942  1.00  0.02           H  
ATOM    790  HB2 MET D 259      35.092  56.732  -6.596  1.00  0.02           H  
ATOM    791  HA  MET D 259      36.232  58.554  -8.686  1.00  0.09           H  
ATOM    792  N   VAL D 260      34.747  60.023  -6.201  1.00 -0.42           N  
ATOM    793  CA  VAL D 260      33.722  61.014  -5.896  1.00 -0.09           C  
ATOM    794  C   VAL D 260      34.268  62.345  -5.425  1.00  0.60           C  
ATOM    795  O   VAL D 260      34.854  62.433  -4.340  1.00 -0.57           O  
ATOM    796  CB  VAL D 260      32.635  60.502  -4.912  1.00  0.30           C  
ATOM    797  CG1 VAL D 260      31.370  60.042  -5.677  1.00 -0.32           C  
ATOM    798  CG2 VAL D 260      33.206  59.437  -3.969  1.00 -0.32           C  
ATOM    799  H   VAL D 260      35.358  59.682  -5.486  1.00  0.27           H  
ATOM    800 HG23 VAL D 260      33.568  58.581  -4.558  1.00  0.08           H  
ATOM    801 HG22 VAL D 260      32.420  59.100  -3.278  1.00  0.08           H  
ATOM    802 HG21 VAL D 260      34.040  59.865  -3.394  1.00  0.08           H  
ATOM    803 HG13 VAL D 260      30.954  60.890  -6.240  1.00  0.08           H  
ATOM    804 HG12 VAL D 260      30.621  59.675  -4.960  1.00  0.08           H  
ATOM    805 HG11 VAL D 260      31.637  59.234  -6.374  1.00  0.08           H  
ATOM    806  HB  VAL D 260      32.334  61.354  -4.284  1.00 -0.03           H  
ATOM    807  HA  VAL D 260      33.209  61.212  -6.849  1.00  0.10           H  
TER     808      VAL D 260                                                      
ATOM    809  N   PHE D 268      27.284  55.800  -9.538  1.00 -0.42           N  
ATOM    810  CA  PHE D 268      27.922  55.202 -10.708  1.00 -0.00           C  
ATOM    811  C   PHE D 268      26.943  54.496 -11.651  1.00  0.60           C  
ATOM    812  O   PHE D 268      26.128  53.687 -11.206  1.00 -0.57           O  
ATOM    813  CB  PHE D 268      28.946  54.191 -10.228  1.00 -0.03           C  
ATOM    814  CG  PHE D 268      29.879  54.738  -9.229  1.00  0.01           C  
ATOM    815  CD1 PHE D 268      30.558  53.884  -8.371  1.00 -0.13           C  
ATOM    816  CD2 PHE D 268      30.112  56.111  -9.150  1.00 -0.13           C  
ATOM    817  CE1 PHE D 268      31.477  54.385  -7.422  1.00 -0.17           C  
ATOM    818  CE2 PHE D 268      31.007  56.636  -8.220  1.00 -0.17           C  
ATOM    819  CZ  PHE D 268      31.698  55.770  -7.344  1.00 -0.11           C  
ATOM    820  H   PHE D 268      27.182  55.228  -8.724  1.00  0.27           H  
ATOM    821 HNCA PHE D 268      26.955  56.765  -9.551  1.00  0.00           H  
ATOM    822  HD2 PHE D 268      29.588  56.780  -9.823  1.00  0.13           H  
ATOM    823  HE2 PHE D 268      31.172  57.706  -8.169  1.00  0.14           H  
ATOM    824  HZ  PHE D 268      32.394  56.171  -6.616  1.00  0.13           H  
ATOM    825  HE1 PHE D 268      32.006  53.708  -6.761  1.00  0.14           H  
ATOM    826  HD1 PHE D 268      30.381  52.816  -8.430  1.00  0.13           H  
ATOM    827  HB3 PHE D 268      29.527  53.843 -11.095  1.00  0.03           H  
ATOM    828  HB2 PHE D 268      28.413  53.340  -9.779  1.00  0.03           H  
ATOM    829  HA  PHE D 268      28.431  55.999 -11.271  1.00  0.10           H  
TER     830      PHE D 268                                                      
ATOM    831  N   PRO D 270      27.318  51.648 -14.235  1.00 -0.25           N  
ATOM    832  CA  PRO D 270      28.272  50.652 -14.731  1.00 -0.03           C  
ATOM    833  C   PRO D 270      27.961  50.280 -16.177  1.00  0.59           C  
ATOM    834  O   PRO D 270      27.039  50.841 -16.774  1.00 -0.57           O  
ATOM    835  CB  PRO D 270      28.065  49.456 -13.791  1.00 -0.01           C  
ATOM    836  CG  PRO D 270      26.769  49.762 -13.015  1.00  0.02           C  
ATOM    837  CD  PRO D 270      26.149  51.012 -13.605  1.00  0.02           C  
ATOM    838 HNCA PRO D 270      27.448  52.656 -14.316  1.00  0.00           H  
ATOM    839  HD2 PRO D 270      25.376  50.765 -14.348  1.00  0.04           H  
ATOM    840  HD3 PRO D 270      25.715  51.653 -12.823  1.00  0.04           H  
ATOM    841  HG2 PRO D 270      26.070  48.918 -13.111  1.00  0.02           H  
ATOM    842  HG3 PRO D 270      27.001  49.927 -11.953  1.00  0.02           H  
ATOM    843  HB3 PRO D 270      28.914  49.360 -13.098  1.00  0.03           H  
ATOM    844  HB2 PRO D 270      27.956  48.527 -14.369  1.00  0.03           H  
ATOM    845  HA  PRO D 270      29.304  51.028 -14.664  1.00  0.06           H  
TER     846      PRO D 270                                                      
ATOM    847  N   PHE D 296      32.006  52.127 -23.716  1.00 -0.42           N  
ATOM    848  CA  PHE D 296      31.719  53.538 -23.595  1.00 -0.00           C  
ATOM    849  C   PHE D 296      30.527  53.923 -24.433  1.00  0.60           C  
ATOM    850  O   PHE D 296      30.263  55.115 -24.616  1.00 -0.57           O  
ATOM    851  CB  PHE D 296      32.917  54.345 -24.044  1.00 -0.03           C  
ATOM    852  CG  PHE D 296      33.748  54.839 -22.930  1.00  0.01           C  
ATOM    853  CD1 PHE D 296      35.104  54.575 -22.917  1.00 -0.13           C  
ATOM    854  CD2 PHE D 296      33.184  55.580 -21.905  1.00 -0.13           C  
ATOM    855  CE1 PHE D 296      35.901  55.036 -21.898  1.00 -0.17           C  
ATOM    856  CE2 PHE D 296      33.954  56.052 -20.886  1.00 -0.17           C  
ATOM    857  CZ  PHE D 296      35.330  55.775 -20.869  1.00 -0.11           C  
ATOM    858  H   PHE D 296      32.428  51.788 -24.557  1.00  0.27           H  
ATOM    859 HNCA PHE D 296      31.781  51.486 -22.955  1.00  0.00           H  
ATOM    860  HD2 PHE D 296      32.120  55.786 -21.914  1.00  0.13           H  
ATOM    861  HE2 PHE D 296      33.507  56.639 -20.092  1.00  0.14           H  
ATOM    862  HZ  PHE D 296      35.946  56.137 -20.054  1.00  0.13           H  
ATOM    863  HE1 PHE D 296      36.964  54.826 -21.896  1.00  0.14           H  
ATOM    864  HD1 PHE D 296      35.544  53.997 -23.721  1.00  0.13           H  
ATOM    865  HB3 PHE D 296      32.557  55.211 -24.620  1.00  0.03           H  
ATOM    866  HB2 PHE D 296      33.542  53.710 -24.689  1.00  0.03           H  
ATOM    867  HA  PHE D 296      31.503  53.767 -22.541  1.00  0.10           H  
TER     868      PHE D 296                                                      
ATOM    869  N   TYR D 312      31.101  63.212 -17.921  1.00 -0.42           N  
ATOM    870  CA  TYR D 312      31.627  62.292 -16.960  1.00 -0.00           C  
ATOM    871  C   TYR D 312      32.377  63.102 -15.947  1.00  0.60           C  
ATOM    872  O   TYR D 312      33.197  63.949 -16.297  1.00 -0.57           O  
ATOM    873  CB  TYR D 312      32.527  61.259 -17.632  1.00 -0.02           C  
ATOM    874  CG  TYR D 312      31.756  60.270 -18.467  1.00 -0.00           C  
ATOM    875  CD1 TYR D 312      31.348  60.592 -19.755  1.00 -0.19           C  
ATOM    876  CD2 TYR D 312      31.411  59.021 -17.967  1.00 -0.19           C  
ATOM    877  CE1 TYR D 312      30.614  59.696 -20.541  1.00 -0.23           C  
ATOM    878  CE2 TYR D 312      30.680  58.111 -18.742  1.00 -0.23           C  
ATOM    879  CZ  TYR D 312      30.286  58.459 -20.039  1.00  0.32           C  
ATOM    880  OH  TYR D 312      29.571  57.598 -20.857  1.00 -0.56           O  
ATOM    881  H   TYR D 312      31.640  63.459 -18.726  1.00  0.27           H  
ATOM    882 HNCA TYR D 312      30.184  63.612 -17.786  1.00  0.00           H  
ATOM    883  HD2 TYR D 312      31.712  58.746 -16.962  1.00  0.17           H  
ATOM    884  HE2 TYR D 312      30.420  57.139 -18.338  1.00  0.17           H  
ATOM    885  HH  TYR D 312      29.404  58.020 -21.692  1.00  0.40           H  
ATOM    886  HE1 TYR D 312      30.305  59.977 -21.542  1.00  0.17           H  
ATOM    887  HD1 TYR D 312      31.605  61.563 -20.162  1.00  0.17           H  
ATOM    888  HB2 TYR D 312      33.075  60.709 -16.852  1.00  0.03           H  
ATOM    889  HB3 TYR D 312      33.243  61.785 -18.281  1.00  0.03           H  
ATOM    890  HA  TYR D 312      30.798  61.765 -16.464  1.00  0.09           H  
ATOM    891  N   LEU D 313      32.052  62.866 -14.684  1.00 -0.42           N  
ATOM    892  CA  LEU D 313      32.834  63.408 -13.587  1.00 -0.05           C  
ATOM    893  C   LEU D 313      34.171  62.693 -13.532  1.00  0.60           C  
ATOM    894  O   LEU D 313      35.210  63.288 -13.800  1.00 -0.57           O  
ATOM    895  CB  LEU D 313      32.095  63.243 -12.259  1.00 -0.11           C  
ATOM    896  CG  LEU D 313      31.764  64.525 -11.492  1.00  0.35           C  
ATOM    897  CD1 LEU D 313      32.448  65.754 -12.128  1.00 -0.41           C  
ATOM    898  CD2 LEU D 313      30.242  64.704 -11.399  1.00 -0.41           C  
ATOM    899  H   LEU D 313      31.251  62.303 -14.482  1.00  0.27           H  
ATOM    900 HD13 LEU D 313      33.539  65.617 -12.108  1.00  0.10           H  
ATOM    901 HD12 LEU D 313      32.181  66.657 -11.560  1.00  0.10           H  
ATOM    902 HD11 LEU D 313      32.111  65.863 -13.169  1.00  0.10           H  
ATOM    903 HD23 LEU D 313      29.819  64.779 -12.412  1.00  0.10           H  
ATOM    904 HD22 LEU D 313      30.014  65.622 -10.838  1.00  0.10           H  
ATOM    905 HD21 LEU D 313      29.802  63.839 -10.881  1.00  0.10           H  
ATOM    906  HG  LEU D 313      32.155  64.419 -10.469  1.00 -0.04           H  
ATOM    907  HB3 LEU D 313      32.719  62.616 -11.606  1.00  0.05           H  
ATOM    908  HB2 LEU D 313      31.147  62.725 -12.467  1.00  0.05           H  
ATOM    909  HA  LEU D 313      33.006  64.480 -13.765  1.00  0.09           H  
ATOM    910  N   THR D 314      34.133  61.415 -13.179  1.00 -0.42           N  
ATOM    911  CA  THR D 314      35.317  60.581 -13.209  1.00 -0.04           C  
ATOM    912  C   THR D 314      34.917  59.156 -13.596  1.00  0.60           C  
ATOM    913  O   THR D 314      33.792  58.707 -13.325  1.00 -0.57           O  
ATOM    914  CB  THR D 314      36.093  60.641 -11.857  1.00  0.37           C  
ATOM    915  OG1 THR D 314      35.350  59.996 -10.819  1.00 -0.68           O  
ATOM    916  CG2 THR D 314      36.191  62.063 -11.343  1.00 -0.24           C  
ATOM    917  H   THR D 314      33.264  61.017 -12.884  1.00  0.27           H  
ATOM    918 HG22 THR D 314      36.072  62.067 -10.249  1.00  0.06           H  
ATOM    919 HG21 THR D 314      35.398  62.673 -11.800  1.00  0.06           H  
ATOM    920 HG23 THR D 314      37.174  62.481 -11.607  1.00  0.06           H  
ATOM    921  HG1 THR D 314      35.837  60.042 -10.005  1.00  0.41           H  
ATOM    922  HB  THR D 314      37.089  60.190 -11.980  1.00  0.00           H  
ATOM    923  HA  THR D 314      35.987  60.967 -13.991  1.00  0.10           H  
ATOM    924  N   VAL D 315      35.835  58.454 -14.253  1.00 -0.42           N  
ATOM    925  CA  VAL D 315      35.562  57.100 -14.710  1.00 -0.09           C  
ATOM    926  C   VAL D 315      36.718  56.159 -14.451  1.00  0.60           C  
ATOM    927  O   VAL D 315      37.840  56.421 -14.864  1.00 -0.57           O  
ATOM    928  CB  VAL D 315      35.251  57.080 -16.210  1.00  0.30           C  
ATOM    929  CG1 VAL D 315      35.518  55.696 -16.818  1.00 -0.32           C  
ATOM    930  CG2 VAL D 315      33.823  57.493 -16.436  1.00 -0.32           C  
ATOM    931  H   VAL D 315      36.729  58.864 -14.436  1.00  0.27           H  
ATOM    932 HG23 VAL D 315      33.152  56.788 -15.923  1.00  0.08           H  
ATOM    933 HG22 VAL D 315      33.606  57.487 -17.514  1.00  0.08           H  
ATOM    934 HG21 VAL D 315      33.666  58.505 -16.036  1.00  0.08           H  
ATOM    935 HG13 VAL D 315      36.579  55.436 -16.686  1.00  0.08           H  
ATOM    936 HG12 VAL D 315      35.275  55.714 -17.891  1.00  0.08           H  
ATOM    937 HG11 VAL D 315      34.891  54.946 -16.313  1.00  0.08           H  
ATOM    938  HB  VAL D 315      35.908  57.807 -16.710  1.00 -0.03           H  
ATOM    939  HA  VAL D 315      34.683  56.729 -14.163  1.00  0.10           H  
ATOM    940  N   ALA D 316      36.432  55.059 -13.768  1.00 -0.42           N  
ATOM    941  CA  ALA D 316      37.385  53.969 -13.653  1.00  0.03           C  
ATOM    942  C   ALA D 316      36.979  52.894 -14.644  1.00  0.60           C  
ATOM    943  O   ALA D 316      35.779  52.666 -14.870  1.00 -0.57           O  
ATOM    944  CB  ALA D 316      37.378  53.417 -12.260  1.00 -0.18           C  
ATOM    945  H   ALA D 316      35.541  54.978 -13.322  1.00  0.27           H  
ATOM    946  HB3 ALA D 316      36.372  53.042 -12.019  1.00  0.06           H  
ATOM    947  HB2 ALA D 316      37.653  54.211 -11.550  1.00  0.06           H  
ATOM    948  HB1 ALA D 316      38.104  52.593 -12.188  1.00  0.06           H  
ATOM    949  HA  ALA D 316      38.395  54.333 -13.893  1.00  0.08           H  
ATOM    950  N   ALA D 317      37.960  52.237 -15.255  1.00 -0.42           N  
ATOM    951  CA  ALA D 317      37.636  51.105 -16.128  1.00  0.03           C  
ATOM    952  C   ALA D 317      38.625  49.946 -15.990  1.00  0.60           C  
ATOM    953  O   ALA D 317      39.796  50.133 -15.617  1.00 -0.57           O  
ATOM    954  CB  ALA D 317      37.440  51.539 -17.609  1.00 -0.18           C  
ATOM    955  H   ALA D 317      38.912  52.513 -15.120  1.00  0.27           H  
ATOM    956  HB3 ALA D 317      38.366  52.002 -17.981  1.00  0.06           H  
ATOM    957  HB2 ALA D 317      36.616  52.265 -17.672  1.00  0.06           H  
ATOM    958  HB1 ALA D 317      37.200  50.657 -18.221  1.00  0.06           H  
ATOM    959  HA  ALA D 317      36.663  50.722 -15.786  1.00  0.08           H  
ATOM    960  N   VAL D 318      38.122  48.747 -16.293  1.00 -0.42           N  
ATOM    961  CA  VAL D 318      38.857  47.501 -16.034  1.00 -0.09           C  
ATOM    962  C   VAL D 318      38.685  46.376 -17.120  1.00  0.60           C  
ATOM    963  O   VAL D 318      37.566  45.927 -17.463  1.00 -0.57           O  
ATOM    964  CB  VAL D 318      38.659  47.024 -14.542  1.00  0.30           C  
ATOM    965  CG1 VAL D 318      37.209  46.564 -14.269  1.00 -0.32           C  
ATOM    966  CG2 VAL D 318      39.664  45.958 -14.166  1.00 -0.32           C  
ATOM    967  H   VAL D 318      37.215  48.695 -16.710  1.00  0.27           H  
ATOM    968 HG23 VAL D 318      39.535  45.085 -14.823  1.00  0.08           H  
ATOM    969 HG22 VAL D 318      39.505  45.657 -13.120  1.00  0.08           H  
ATOM    970 HG21 VAL D 318      40.682  46.357 -14.282  1.00  0.08           H  
ATOM    971 HG13 VAL D 318      36.519  47.402 -14.447  1.00  0.08           H  
ATOM    972 HG12 VAL D 318      37.120  46.232 -13.224  1.00  0.08           H  
ATOM    973 HG11 VAL D 318      36.956  45.731 -14.941  1.00  0.08           H  
ATOM    974  HB  VAL D 318      38.849  47.893 -13.896  1.00 -0.03           H  
ATOM    975  HA  VAL D 318      39.919  47.780 -16.104  1.00  0.10           H  
ATOM    976  N   PHE D 319      39.843  45.957 -17.643  1.00 -0.42           N  
ATOM    977  CA  PHE D 319      39.966  45.068 -18.801  1.00 -0.00           C  
ATOM    978  C   PHE D 319      40.423  43.694 -18.366  1.00  0.60           C  
ATOM    979  O   PHE D 319      41.341  43.565 -17.527  1.00 -0.57           O  
ATOM    980  CB  PHE D 319      41.036  45.604 -19.756  1.00 -0.03           C  
ATOM    981  CG  PHE D 319      40.606  46.790 -20.553  1.00  0.01           C  
ATOM    982  CD1 PHE D 319      39.992  47.890 -19.949  1.00 -0.13           C  
ATOM    983  CD2 PHE D 319      40.825  46.817 -21.909  1.00 -0.13           C  
ATOM    984  CE1 PHE D 319      39.596  48.990 -20.685  1.00 -0.17           C  
ATOM    985  CE2 PHE D 319      40.431  47.916 -22.662  1.00 -0.17           C  
ATOM    986  CZ  PHE D 319      39.817  49.007 -22.043  1.00 -0.11           C  
ATOM    987  H   PHE D 319      40.687  46.274 -17.211  1.00  0.27           H  
ATOM    988  HD2 PHE D 319      41.308  45.976 -22.394  1.00  0.13           H  
ATOM    989  HE2 PHE D 319      40.601  47.927 -23.733  1.00  0.14           H  
ATOM    990  HZ  PHE D 319      39.515  49.866 -22.631  1.00  0.13           H  
ATOM    991  HE1 PHE D 319      39.116  49.831 -20.198  1.00  0.14           H  
ATOM    992  HD1 PHE D 319      39.822  47.880 -18.878  1.00  0.13           H  
ATOM    993  HB3 PHE D 319      41.309  44.800 -20.455  1.00  0.03           H  
ATOM    994  HB2 PHE D 319      41.917  45.889 -19.162  1.00  0.03           H  
ATOM    995  HA  PHE D 319      38.996  44.999 -19.316  1.00  0.10           H  
TER     996      PHE D 319                                                      
ATOM    997  N   MET D 332      42.317  53.837 -24.761  1.00 -0.42           N  
ATOM    998  CA  MET D 332      41.756  54.608 -23.647  1.00 -0.02           C  
ATOM    999  C   MET D 332      42.017  56.080 -23.908  1.00  0.60           C  
ATOM   1000  O   MET D 332      41.092  56.893 -23.958  1.00 -0.57           O  
ATOM   1001  CB  MET D 332      42.408  54.199 -22.313  1.00  0.03           C  
ATOM   1002  CG  MET D 332      41.476  53.594 -21.247  1.00  0.00           C  
ATOM   1003  SD  MET D 332      39.850  52.948 -21.790  1.00 -0.27           S  
ATOM   1004  CE  MET D 332      38.750  53.991 -20.878  1.00 -0.05           C  
ATOM   1005  H   MET D 332      42.942  53.086 -24.550  1.00  0.27           H  
ATOM   1006 HNCA MET D 332      42.076  54.061 -25.726  1.00  0.00           H  
ATOM   1007  HE3 MET D 332      38.928  53.858 -19.801  1.00  0.07           H  
ATOM   1008  HE2 MET D 332      37.710  53.722 -21.114  1.00  0.07           H  
ATOM   1009  HE1 MET D 332      38.929  55.041 -21.152  1.00  0.07           H  
ATOM   1010 LPD2 MET D 332      39.772  52.295 -21.621  1.00  0.00          LP  
ATOM   1011 LPD1 MET D 332      39.764  53.020 -22.460  1.00  0.00          LP  
ATOM   1012  HG3 MET D 332      41.283  54.377 -20.499  1.00  0.04           H  
ATOM   1013  HG2 MET D 332      42.017  52.761 -20.775  1.00  0.04           H  
ATOM   1014  HB3 MET D 332      42.872  55.097 -21.879  1.00  0.02           H  
ATOM   1015  HB2 MET D 332      43.187  53.455 -22.536  1.00  0.02           H  
ATOM   1016  HA  MET D 332      40.672  54.429 -23.589  1.00  0.09           H  
TER    1017      MET D 332                                                      
ATOM   1018  N   PHE D 343      34.466  65.021 -20.830  1.00 -0.42           N  
ATOM   1019  CA  PHE D 343      35.068  64.814 -19.516  1.00 -0.00           C  
ATOM   1020  C   PHE D 343      35.433  66.167 -18.953  1.00  0.60           C  
ATOM   1021  O   PHE D 343      36.433  66.782 -19.352  1.00 -0.57           O  
ATOM   1022  CB  PHE D 343      36.311  63.890 -19.533  1.00 -0.03           C  
ATOM   1023  CG  PHE D 343      36.062  62.548 -20.160  1.00  0.01           C  
ATOM   1024  CD1 PHE D 343      36.391  62.324 -21.503  1.00 -0.13           C  
ATOM   1025  CD2 PHE D 343      35.477  61.513 -19.428  1.00 -0.13           C  
ATOM   1026  CE1 PHE D 343      36.149  61.084 -22.113  1.00 -0.17           C  
ATOM   1027  CE2 PHE D 343      35.217  60.269 -20.029  1.00 -0.17           C  
ATOM   1028  CZ  PHE D 343      35.560  60.054 -21.376  1.00 -0.11           C  
ATOM   1029  H   PHE D 343      34.886  65.668 -21.466  1.00  0.27           H  
ATOM   1030 HNCA PHE D 343      33.624  64.511 -21.097  1.00  0.00           H  
ATOM   1031  HD2 PHE D 343      35.221  61.670 -18.387  1.00  0.13           H  
ATOM   1032  HE2 PHE D 343      34.752  59.476 -19.454  1.00  0.14           H  
ATOM   1033  HZ  PHE D 343      35.368  59.093 -21.840  1.00  0.13           H  
ATOM   1034  HE1 PHE D 343      36.418  60.926 -23.151  1.00  0.14           H  
ATOM   1035  HD1 PHE D 343      36.841  63.123 -22.081  1.00  0.13           H  
ATOM   1036  HB3 PHE D 343      36.640  63.732 -18.495  1.00  0.03           H  
ATOM   1037  HB2 PHE D 343      37.109  64.394 -20.098  1.00  0.03           H  
ATOM   1038  HA  PHE D 343      34.314  64.349 -18.864  1.00  0.10           H  
TER    1039      PHE D 343                                                      
ATOM   1040  N   ILE D 347      38.469  68.446 -13.184  1.00 -0.42           N  
ATOM   1041  CA  ILE D 347      39.205  67.336 -12.572  1.00 -0.06           C  
ATOM   1042  C   ILE D 347      40.204  66.878 -13.639  1.00  0.60           C  
ATOM   1043  O   ILE D 347      39.777  66.472 -14.731  1.00 -0.57           O  
ATOM   1044  CB  ILE D 347      38.244  66.201 -12.204  1.00  0.13           C  
ATOM   1045  CG1 ILE D 347      37.459  66.544 -10.949  1.00 -0.04           C  
ATOM   1046  CG2 ILE D 347      38.975  64.928 -11.962  1.00 -0.32           C  
ATOM   1047  CD1 ILE D 347      36.126  65.792 -10.904  1.00 -0.07           C  
ATOM   1048  H   ILE D 347      37.734  68.245 -13.832  1.00  0.27           H  
ATOM   1049 HNCA ILE D 347      38.703  69.411 -12.952  1.00  0.00           H  
ATOM   1050 HG23 ILE D 347      39.514  64.635 -12.875  1.00  0.09           H  
ATOM   1051 HG22 ILE D 347      38.258  64.139 -11.691  1.00  0.09           H  
ATOM   1052 HG21 ILE D 347      39.694  65.068 -11.141  1.00  0.09           H  
ATOM   1053 HD13 ILE D 347      35.517  66.073 -11.776  1.00  0.02           H  
ATOM   1054 HD12 ILE D 347      35.588  66.054  -9.981  1.00  0.02           H  
ATOM   1055 HD11 ILE D 347      36.315  64.709 -10.923  1.00  0.02           H  
ATOM   1056 HG13 ILE D 347      37.261  67.626 -10.935  1.00  0.02           H  
ATOM   1057 HG12 ILE D 347      38.056  66.269 -10.067  1.00  0.02           H  
ATOM   1058  HB  ILE D 347      37.542  66.056 -13.038  1.00  0.02           H  
ATOM   1059  HA  ILE D 347      39.735  67.675 -11.669  1.00  0.09           H  
ATOM   1060  N   PRO D 348      41.509  66.978 -13.363  1.00 -0.25           N  
ATOM   1061  CA  PRO D 348      42.530  66.575 -14.328  1.00 -0.03           C  
ATOM   1062  C   PRO D 348      42.363  65.124 -14.709  1.00  0.59           C  
ATOM   1063  O   PRO D 348      41.249  64.729 -15.050  1.00 -0.57           O  
ATOM   1064  CB  PRO D 348      43.809  66.797 -13.565  1.00 -0.01           C  
ATOM   1065  CG  PRO D 348      43.450  67.871 -12.674  1.00  0.02           C  
ATOM   1066  CD  PRO D 348      42.118  67.505 -12.140  1.00  0.02           C  
ATOM   1067  HD2 PRO D 348      42.187  66.740 -11.352  1.00  0.04           H  
ATOM   1068  HD3 PRO D 348      41.575  68.380 -11.755  1.00  0.04           H  
ATOM   1069  HG2 PRO D 348      44.183  67.956 -11.858  1.00  0.02           H  
ATOM   1070  HG3 PRO D 348      43.398  68.824 -13.220  1.00  0.02           H  
ATOM   1071  HB3 PRO D 348      44.628  67.093 -14.237  1.00  0.03           H  
ATOM   1072  HB2 PRO D 348      44.101  65.896 -13.006  1.00  0.03           H  
ATOM   1073  HA  PRO D 348      42.493  67.200 -15.233  1.00  0.06           H  
ATOM   1074  N   ASN D 349      43.423  64.334 -14.643  1.00 -0.42           N  
ATOM   1075  CA  ASN D 349      43.420  62.993 -15.248  1.00  0.01           C  
ATOM   1076  C   ASN D 349      42.378  62.005 -14.702  1.00  0.60           C  
ATOM   1077  O   ASN D 349      42.717  61.044 -13.983  1.00 -0.57           O  
ATOM   1078  CB  ASN D 349      44.835  62.457 -15.217  1.00 -0.20           C  
ATOM   1079  CG  ASN D 349      45.831  63.573 -15.334  1.00  0.71           C  
ATOM   1080  OD1 ASN D 349      45.886  64.441 -14.468  1.00 -0.59           O  
ATOM   1081  ND2 ASN D 349      46.567  63.613 -16.438  1.00 -0.92           N  
ATOM   1082  H   ASN D 349      44.244  64.656 -14.172  1.00  0.27           H  
ATOM   1083 HD21 ASN D 349      46.444  62.918 -17.146  1.00  0.42           H  
ATOM   1084 HD22 ASN D 349      47.244  64.338 -16.561  1.00  0.42           H  
ATOM   1085  HB3 ASN D 349      44.975  61.760 -16.056  1.00  0.08           H  
ATOM   1086  HB2 ASN D 349      44.999  61.926 -14.268  1.00  0.08           H  
ATOM   1087  HA  ASN D 349      43.157  63.134 -16.307  1.00  0.10           H  
ATOM   1088  N   ASN D 350      41.121  62.252 -15.104  1.00 -0.42           N  
ATOM   1089  CA  ASN D 350      39.928  61.702 -14.454  1.00  0.01           C  
ATOM   1090  C   ASN D 350      39.451  60.388 -15.038  1.00  0.60           C  
ATOM   1091  O   ASN D 350      38.356  59.914 -14.701  1.00 -0.57           O  
ATOM   1092  CB  ASN D 350      38.787  62.737 -14.397  1.00 -0.20           C  
ATOM   1093  CG  ASN D 350      38.302  63.171 -15.780  1.00  0.71           C  
ATOM   1094  OD1 ASN D 350      39.066  63.160 -16.758  1.00 -0.59           O  
ATOM   1095  ND2 ASN D 350      37.029  63.558 -15.872  1.00 -0.92           N  
ATOM   1096  H   ASN D 350      40.991  62.848 -15.896  1.00  0.27           H  
ATOM   1097 HD21 ASN D 350      36.446  63.554 -15.060  1.00  0.42           H  
ATOM   1098 HD22 ASN D 350      36.658  63.852 -16.753  1.00  0.42           H  
ATOM   1099  HB3 ASN D 350      39.147  63.626 -13.857  1.00  0.08           H  
ATOM   1100  HB2 ASN D 350      37.940  62.295 -13.852  1.00  0.08           H  
ATOM   1101  HA  ASN D 350      40.216  61.490 -13.414  1.00  0.10           H  
ATOM   1102  N   VAL D 351      40.269  59.808 -15.916  1.00 -0.42           N  
ATOM   1103  CA  VAL D 351      40.097  58.415 -16.307  1.00 -0.09           C  
ATOM   1104  C   VAL D 351      41.355  57.655 -15.941  1.00  0.60           C  
ATOM   1105  O   VAL D 351      42.445  58.031 -16.366  1.00 -0.57           O  
ATOM   1106  CB  VAL D 351      39.775  58.232 -17.801  1.00  0.30           C  
ATOM   1107  CG1 VAL D 351      41.000  57.794 -18.583  1.00 -0.32           C  
ATOM   1108  CG2 VAL D 351      38.663  57.221 -17.970  1.00 -0.32           C  
ATOM   1109  H   VAL D 351      41.016  60.340 -16.315  1.00  0.27           H  
ATOM   1110 HG23 VAL D 351      38.981  56.253 -17.556  1.00  0.08           H  
ATOM   1111 HG22 VAL D 351      38.433  57.104 -19.039  1.00  0.08           H  
ATOM   1112 HG21 VAL D 351      37.766  57.570 -17.438  1.00  0.08           H  
ATOM   1113 HG13 VAL D 351      41.784  58.560 -18.495  1.00  0.08           H  
ATOM   1114 HG12 VAL D 351      40.732  57.663 -19.642  1.00  0.08           H  
ATOM   1115 HG11 VAL D 351      41.372  56.841 -18.179  1.00  0.08           H  
ATOM   1116  HB  VAL D 351      39.435  59.198 -18.203  1.00 -0.03           H  
ATOM   1117  HA  VAL D 351      39.256  58.001 -15.731  1.00  0.10           H  
ATOM   1118  N   LYS D 352      41.203  56.626 -15.107  1.00 -0.35           N  
ATOM   1119  CA  LYS D 352      42.255  55.645 -14.853  1.00 -0.24           C  
ATOM   1120  C   LYS D 352      41.708  54.288 -15.308  1.00  0.73           C  
ATOM   1121  O   LYS D 352      40.494  54.029 -15.221  1.00 -0.59           O  
ATOM   1122  CB  LYS D 352      42.646  55.627 -13.374  1.00 -0.01           C  
ATOM   1123  CG  LYS D 352      43.056  56.979 -12.809  1.00  0.02           C  
ATOM   1124  CD  LYS D 352      44.497  57.291 -13.163  1.00 -0.05           C  
ATOM   1125  CE  LYS D 352      45.005  58.508 -12.414  1.00 -0.01           C  
ATOM   1126  NZ  LYS D 352      44.896  59.742 -13.249  1.00 -0.39           N  
ATOM   1127  H   LYS D 352      40.328  56.521 -14.634  1.00  0.27           H  
ATOM   1128  HZ3 LYS D 352      45.451  59.633 -14.083  1.00  0.34           H  
ATOM   1129  HZ2 LYS D 352      45.231  60.534 -12.723  1.00  0.34           H  
ATOM   1130  HZ1 LYS D 352      43.932  59.891 -13.504  1.00  0.34           H  
ATOM   1131  HE3 LYS D 352      46.060  58.349 -12.145  1.00  0.11           H  
ATOM   1132  HE2 LYS D 352      44.409  58.640 -11.499  1.00  0.11           H  
ATOM   1133  HD3 LYS D 352      44.566  57.483 -14.244  1.00  0.06           H  
ATOM   1134  HD2 LYS D 352      45.124  56.425 -12.904  1.00  0.06           H  
ATOM   1135  HG3 LYS D 352      42.949  56.961 -11.714  1.00  0.01           H  
ATOM   1136  HG2 LYS D 352      42.404  57.759 -13.229  1.00  0.01           H  
ATOM   1137  HB3 LYS D 352      43.491  54.934 -13.251  1.00  0.04           H  
ATOM   1138  HB2 LYS D 352      41.785  55.261 -12.796  1.00  0.04           H  
ATOM   1139  HA  LYS D 352      43.145  55.898 -15.447  1.00  0.14           H  
ATOM   1140  N   THR D 353      42.578  53.442 -15.848  1.00 -0.42           N  
ATOM   1141  CA  THR D 353      42.154  52.094 -16.212  1.00 -0.04           C  
ATOM   1142  C   THR D 353      43.184  51.109 -15.795  1.00  0.60           C  
ATOM   1143  O   THR D 353      44.376  51.421 -15.728  1.00 -0.57           O  
ATOM   1144  CB  THR D 353      41.905  51.916 -17.705  1.00  0.37           C  
ATOM   1145  OG1 THR D 353      42.960  52.524 -18.443  1.00 -0.68           O  
ATOM   1146  CG2 THR D 353      40.694  52.680 -18.138  1.00 -0.24           C  
ATOM   1147  H   THR D 353      43.523  53.729 -16.005  1.00  0.27           H  
ATOM   1148 HG22 THR D 353      40.875  53.124 -19.128  1.00  0.06           H  
ATOM   1149 HG21 THR D 353      40.485  53.479 -17.411  1.00  0.06           H  
ATOM   1150 HG23 THR D 353      39.831  51.999 -18.193  1.00  0.06           H  
ATOM   1151  HG1 THR D 353      42.802  52.411 -19.373  1.00  0.41           H  
ATOM   1152  HB  THR D 353      41.809  50.847 -17.946  1.00  0.00           H  
ATOM   1153  HA  THR D 353      41.217  51.879 -15.678  1.00  0.10           H  
ATOM   1154  N   ALA D 354      42.700  49.910 -15.509  1.00 -0.42           N  
ATOM   1155  CA  ALA D 354      43.559  48.803 -15.102  1.00  0.03           C  
ATOM   1156  C   ALA D 354      43.181  47.515 -15.847  1.00  0.60           C  
ATOM   1157  O   ALA D 354      42.130  47.421 -16.509  1.00 -0.57           O  
ATOM   1158  CB  ALA D 354      43.607  48.606 -13.519  1.00 -0.18           C  
ATOM   1159  H   ALA D 354      41.714  49.758 -15.574  1.00  0.27           H  
ATOM   1160  HB3 ALA D 354      42.594  48.400 -13.144  1.00  0.06           H  
ATOM   1161  HB2 ALA D 354      43.993  49.522 -13.047  1.00  0.06           H  
ATOM   1162  HB1 ALA D 354      44.267  47.761 -13.275  1.00  0.06           H  
ATOM   1163  HA  ALA D 354      44.581  49.063 -15.414  1.00  0.08           H  
ATOM   1164  N   VAL D 355      44.082  46.545 -15.732  1.00 -0.42           N  
ATOM   1165  CA  VAL D 355      44.082  45.359 -16.562  1.00 -0.09           C  
ATOM   1166  C   VAL D 355      44.277  44.154 -15.673  1.00  0.60           C  
ATOM   1167  O   VAL D 355      45.209  44.114 -14.846  1.00 -0.57           O  
ATOM   1168  CB  VAL D 355      45.222  45.407 -17.631  1.00  0.30           C  
ATOM   1169  CG1 VAL D 355      44.759  46.173 -18.853  1.00 -0.32           C  
ATOM   1170  CG2 VAL D 355      46.552  46.010 -17.062  1.00 -0.32           C  
ATOM   1171  H   VAL D 355      44.795  46.639 -15.038  1.00  0.27           H  
ATOM   1172 HG23 VAL D 355      46.372  47.041 -16.724  1.00  0.08           H  
ATOM   1173 HG22 VAL D 355      47.320  46.011 -17.849  1.00  0.08           H  
ATOM   1174 HG21 VAL D 355      46.897  45.401 -16.213  1.00  0.08           H  
ATOM   1175 HG13 VAL D 355      43.885  45.669 -19.292  1.00  0.08           H  
ATOM   1176 HG12 VAL D 355      45.572  46.209 -19.593  1.00  0.08           H  
ATOM   1177 HG11 VAL D 355      44.483  47.197 -18.561  1.00  0.08           H  
ATOM   1178  HB  VAL D 355      45.434  44.373 -17.939  1.00 -0.03           H  
ATOM   1179  HA  VAL D 355      43.114  45.281 -17.078  1.00  0.10           H  
TER    1180      VAL D 355                                                      
ATOM   1181  N   ALA D 375      35.657  43.534 -20.774  1.00 -0.42           N  
ATOM   1182  CA  ALA D 375      35.976  44.798 -20.113  1.00  0.03           C  
ATOM   1183  C   ALA D 375      34.769  45.393 -19.412  1.00  0.60           C  
ATOM   1184  O   ALA D 375      33.605  45.136 -19.785  1.00 -0.57           O  
ATOM   1185  CB  ALA D 375      36.557  45.795 -21.089  1.00 -0.18           C  
ATOM   1186  H   ALA D 375      34.700  43.285 -20.926  1.00  0.27           H  
ATOM   1187 HNCA ALA D 375      36.405  42.910 -21.078  1.00  0.00           H  
ATOM   1188  HB3 ALA D 375      35.828  45.992 -21.889  1.00  0.06           H  
ATOM   1189  HB2 ALA D 375      37.480  45.385 -21.526  1.00  0.06           H  
ATOM   1190  HB1 ALA D 375      36.786  46.733 -20.562  1.00  0.06           H  
ATOM   1191  HA  ALA D 375      36.739  44.589 -19.348  1.00  0.08           H  
ATOM   1192  N   THR D 376      35.069  46.199 -18.394  1.00 -0.42           N  
ATOM   1193  CA  THR D 376      34.029  46.780 -17.563  1.00 -0.04           C  
ATOM   1194  C   THR D 376      34.284  48.260 -17.182  1.00  0.60           C  
ATOM   1195  O   THR D 376      35.433  48.724 -17.023  1.00 -0.57           O  
ATOM   1196  CB  THR D 376      33.686  45.820 -16.363  1.00  0.37           C  
ATOM   1197  OG1 THR D 376      33.791  46.502 -15.113  1.00 -0.68           O  
ATOM   1198  CG2 THR D 376      34.731  44.710 -16.235  1.00 -0.24           C  
ATOM   1199  H   THR D 376      36.027  46.407 -18.199  1.00  0.27           H  
ATOM   1200 HG22 THR D 376      34.928  44.513 -15.171  1.00  0.06           H  
ATOM   1201 HG21 THR D 376      35.663  45.025 -16.728  1.00  0.06           H  
ATOM   1202 HG23 THR D 376      34.354  43.794 -16.714  1.00  0.06           H  
ATOM   1203  HG1 THR D 376      33.580  45.903 -14.407  1.00  0.41           H  
ATOM   1204  HB  THR D 376      32.678  45.402 -16.503  1.00  0.00           H  
ATOM   1205  HA  THR D 376      33.124  46.803 -18.188  1.00  0.10           H  
ATOM   1206  N   PHE D 377      33.164  48.977 -17.077  1.00 -0.42           N  
ATOM   1207  CA  PHE D 377      33.116  50.429 -17.006  1.00 -0.00           C  
ATOM   1208  C   PHE D 377      32.447  50.924 -15.722  1.00  0.60           C  
ATOM   1209  O   PHE D 377      31.305  50.562 -15.428  1.00 -0.57           O  
ATOM   1210  CB  PHE D 377      32.314  50.925 -18.210  1.00 -0.03           C  
ATOM   1211  CG  PHE D 377      31.901  52.355 -18.111  1.00  0.01           C  
ATOM   1212  CD1 PHE D 377      32.823  53.369 -18.318  1.00 -0.13           C  
ATOM   1213  CD2 PHE D 377      30.595  52.695 -17.796  1.00 -0.13           C  
ATOM   1214  CE1 PHE D 377      32.453  54.698 -18.220  1.00 -0.17           C  
ATOM   1215  CE2 PHE D 377      30.218  54.026 -17.692  1.00 -0.17           C  
ATOM   1216  CZ  PHE D 377      31.155  55.026 -17.905  1.00 -0.11           C  
ATOM   1217  H   PHE D 377      32.296  48.481 -17.045  1.00  0.27           H  
ATOM   1218  HD2 PHE D 377      29.862  51.914 -17.629  1.00  0.13           H  
ATOM   1219  HE2 PHE D 377      29.194  54.284 -17.445  1.00  0.14           H  
ATOM   1220  HZ  PHE D 377      30.864  56.067 -17.823  1.00  0.13           H  
ATOM   1221  HE1 PHE D 377      33.185  55.480 -18.391  1.00  0.14           H  
ATOM   1222  HD1 PHE D 377      33.849  53.117 -18.560  1.00  0.13           H  
ATOM   1223  HB3 PHE D 377      31.408  50.308 -18.301  1.00  0.03           H  
ATOM   1224  HB2 PHE D 377      32.932  50.804 -19.112  1.00  0.03           H  
ATOM   1225  HA  PHE D 377      34.140  50.827 -17.050  1.00  0.10           H  
ATOM   1226  N   ILE D 378      33.136  51.762 -14.966  1.00 -0.42           N  
ATOM   1227  CA  ILE D 378      32.523  52.334 -13.783  1.00 -0.06           C  
ATOM   1228  C   ILE D 378      32.369  53.832 -14.008  1.00  0.60           C  
ATOM   1229  O   ILE D 378      33.333  54.514 -14.356  1.00 -0.57           O  
ATOM   1230  CB  ILE D 378      33.380  51.992 -12.538  1.00  0.13           C  
ATOM   1231  CG1 ILE D 378      32.777  50.797 -11.783  1.00 -0.04           C  
ATOM   1232  CG2 ILE D 378      33.577  53.216 -11.610  1.00 -0.32           C  
ATOM   1233  CD1 ILE D 378      33.736  50.083 -10.818  1.00 -0.07           C  
ATOM   1234  H   ILE D 378      34.076  52.000 -15.209  1.00  0.27           H  
ATOM   1235 HG23 ILE D 378      34.094  54.015 -12.162  1.00  0.09           H  
ATOM   1236 HG22 ILE D 378      34.181  52.922 -10.739  1.00  0.09           H  
ATOM   1237 HG21 ILE D 378      32.596  53.580 -11.271  1.00  0.09           H  
ATOM   1238 HD13 ILE D 378      34.595  49.687 -11.380  1.00  0.02           H  
ATOM   1239 HD12 ILE D 378      33.209  49.254 -10.323  1.00  0.02           H  
ATOM   1240 HD11 ILE D 378      34.092  50.796 -10.060  1.00  0.02           H  
ATOM   1241 HG13 ILE D 378      32.433  50.063 -12.527  1.00  0.02           H  
ATOM   1242 HG12 ILE D 378      31.917  51.160 -11.201  1.00  0.02           H  
ATOM   1243  HB  ILE D 378      34.376  51.691 -12.895  1.00  0.02           H  
ATOM   1244  HA  ILE D 378      31.523  51.896 -13.644  1.00  0.09           H  
ATOM   1245  N   GLY D 379      31.168  54.358 -13.810  1.00 -0.42           N  
ATOM   1246  CA  GLY D 379      30.910  55.710 -14.281  1.00 -0.03           C  
ATOM   1247  C   GLY D 379      30.139  56.759 -13.484  1.00  0.60           C  
ATOM   1248  O   GLY D 379      28.876  56.822 -13.541  1.00 -0.57           O  
ATOM   1249  H   GLY D 379      30.453  53.835 -13.346  1.00  0.27           H  
ATOM   1250  HA2 GLY D 379      30.365  55.596 -15.230  1.00  0.07           H  
ATOM   1251  HA3 GLY D 379      31.898  56.151 -14.477  1.00  0.07           H  
ATOM   1252  N   ASN D 380      30.901  57.627 -12.799  1.00 -0.42           N  
ATOM   1253  CA  ASN D 380      30.347  58.849 -12.175  1.00  0.01           C  
ATOM   1254  C   ASN D 380      29.829  59.912 -13.188  1.00  0.60           C  
ATOM   1255  O   ASN D 380      30.418  60.989 -13.329  1.00 -0.57           O  
ATOM   1256  CB  ASN D 380      31.374  59.468 -11.187  1.00 -0.20           C  
ATOM   1257  CG  ASN D 380      30.730  60.425 -10.150  1.00  0.71           C  
ATOM   1258  OD1 ASN D 380      31.265  60.599  -9.045  1.00 -0.59           O  
ATOM   1259  ND2 ASN D 380      29.587  61.047 -10.509  1.00 -0.92           N  
ATOM   1260  H   ASN D 380      31.879  57.441 -12.707  1.00  0.27           H  
ATOM   1261 HD21 ASN D 380      29.190  60.882 -11.412  1.00  0.42           H  
ATOM   1262 HD22 ASN D 380      29.137  61.673  -9.872  1.00  0.42           H  
ATOM   1263  HB3 ASN D 380      32.119  60.032 -11.767  1.00  0.08           H  
ATOM   1264  HB2 ASN D 380      31.873  58.651 -10.645  1.00  0.08           H  
ATOM   1265  HA  ASN D 380      29.476  58.532 -11.583  1.00  0.10           H  
TER    1266      ASN D 380                                                      
HETATM 1267  CAK E70 D 700      37.333  49.312  -9.094  1.00 -0.05           C  
HETATM 1268  H17 E70 D 700      37.541  49.731 -10.072  1.00  0.05           H  
HETATM 1269  CAI E70 D 700      36.071  48.781  -8.821  1.00 -0.04           C  
HETATM 1270  CAT E70 D 700      35.804  48.236  -7.549  1.00  0.08           C  
HETATM 1271  CAH E70 D 700      36.817  48.220  -6.569  1.00 -0.04           C  
HETATM 1272  CAJ E70 D 700      38.081  48.754  -6.837  1.00 -0.05           C  
HETATM 1273  CAU E70 D 700      38.344  49.306  -8.099  1.00  0.05           C  
HETATM 1274  NAQ E70 D 700      39.574  49.820  -8.313  1.00 -0.27           N  
HETATM 1275  H12 E70 D 700      40.260  49.758  -7.547  1.00  0.21           H  
HETATM 1276  CAY E70 D 700      39.966  50.411  -9.466  1.00  0.15           C  
HETATM 1277  NAP E70 D 700      39.312  50.185 -10.660  1.00 -0.30           N  
HETATM 1278  CAF E70 D 700      39.708  50.750 -11.800  1.00 -0.02           C  
HETATM 1279  CAE E70 D 700      40.833  51.603 -11.773  1.00 -0.07           C  
HETATM 1280  CAG E70 D 700      41.536  51.866 -10.588  1.00 -0.04           C  
HETATM 1281  CAX E70 D 700      41.077  51.268  -9.416  1.00  0.11           C  
HETATM 1282  NAR E70 D 700      41.710  51.467  -8.253  1.00 -0.18           N  
HETATM 1283  H8  E70 D 700      42.137  50.663  -7.840  1.00  0.22           H  
HETATM 1284  SAZ E70 D 700      41.872  52.912  -7.403  1.00  0.08           S  
HETATM 1285  CAW E70 D 700      41.272  54.317  -8.379  1.00  0.10           C  
HETATM 1286  CAO E70 D 700      42.165  55.274  -8.894  1.00 -0.04           C  
HETATM 1287  CAM E70 D 700      41.710  56.363  -9.632  1.00 -0.03           C  
HETATM 1288  CAV E70 D 700      40.338  56.495  -9.856  1.00  0.09           C  
HETATM 1289  CAL E70 D 700      39.431  55.546  -9.332  1.00 -0.03           C  
HETATM 1290  CAN E70 D 700      39.892  54.455  -8.593  1.00 -0.04           C  
HETATM 1291  H5  E70 D 700      39.196  53.727  -8.191  1.00  0.06           H  
HETATM 1292  H4  E70 D 700      38.368  55.666  -9.505  1.00  0.05           H  
HETATM 1293  OAS E70 D 700      39.890  57.563 -10.585  1.00 -0.32           O  
HETATM 1294  CAA E70 D 700      39.491  57.206 -11.937  1.00  0.06           C  
HETATM 1295  H3  E70 D 700      40.351  56.776 -12.472  1.00  0.06           H  
HETATM 1296  H2  E70 D 700      38.678  56.467 -11.896  1.00  0.06           H  
HETATM 1297  H1  E70 D 700      39.143  58.105 -12.466  1.00  0.06           H  
HETATM 1298  H6  E70 D 700      42.407  57.094 -10.025  1.00  0.05           H  
HETATM 1299  H7  E70 D 700      43.228  55.161  -8.713  1.00  0.06           H  
HETATM 1300  OAC E70 D 700      40.896  52.777  -6.237  1.00 -0.15           O  
HETATM 1301  OAB E70 D 700      43.346  53.083  -6.859  1.00 -0.15           O  
HETATM 1302  H9  E70 D 700      42.406  52.512 -10.584  1.00  0.05           H  
HETATM 1303  H10 E70 D 700      41.163  52.068 -12.695  1.00  0.06           H  
HETATM 1304  H11 E70 D 700      39.179  50.559 -12.727  1.00  0.06           H  
HETATM 1305  H13 E70 D 700      38.852  48.741  -6.075  1.00  0.05           H  
HETATM 1306  H14 E70 D 700      36.614  47.788  -5.596  1.00  0.05           H  
HETATM 1307  OAD E70 D 700      34.554  47.715  -7.262  1.00 -0.34           O  
HETATM 1308  H15 E70 D 700      33.992  47.803  -8.023  1.00  0.24           H  
HETATM 1309  H16 E70 D 700      35.301  48.788  -9.583  1.00  0.05           H  
HETATM 1310  C   UNK A   2      42.536  52.756 -10.917  1.00  0.00           C  
HETATM 1311  C   UNK A   2      42.567  52.964  -9.515  1.00  0.00           C  
HETATM 1312  C   UNK A   2      41.693  52.262  -8.658  1.00  0.00           C  
HETATM 1313  H   UNK A   2      41.767  52.363  -7.643  1.00  0.00           H  
HETATM 1314  C   UNK A   2      40.717  51.425  -9.213  1.00  0.00           C  
HETATM 1315  C   UNK A   2      40.606  51.299 -10.603  1.00  0.00           C  
HETATM 1316  C   UNK A   2      41.496  51.948 -11.466  1.00  0.00           C  
HETATM 1317  H   UNK A   2      41.420  51.828 -12.480  1.00  0.00           H  
HETATM 1318  C   UNK A   2      39.539  50.441 -10.831  1.00  0.00           C  
HETATM 1319  C   UNK A   2      39.004  50.026  -9.633  1.00  0.00           C  
HETATM 1320  C   UNK A   2      39.737  50.599  -8.490  1.00  0.00           C  
HETATM 1321  H   UNK A   2      40.249  49.828  -7.917  1.00  0.00           H  
HETATM 1322  H   UNK A   2      39.100  51.209  -7.853  1.00  0.00           H  
HETATM 1323  C   UNK A   2      37.923  49.207  -9.964  1.00  0.00           C  
HETATM 1324  N   UNK A   2      37.878  49.171 -11.307  1.00  0.00           N  
HETATM 1325  N   UNK A   2      38.824  49.898 -11.826  1.00  0.00           N  
HETATM 1326  C   UNK A   2      39.022  50.101 -13.213  1.00  0.00           C  
HETATM 1327  H   UNK A   2      38.224  49.630 -13.789  1.00  0.00           H  
HETATM 1328  H   UNK A   2      39.981  49.671 -13.512  1.00  0.00           H  
HETATM 1329  H   UNK A   2      39.025  51.167 -13.441  1.00  0.00           H  
HETATM 1330  N   UNK A   2      36.952  48.576  -9.268  1.00  0.00           N  
HETATM 1331  H   UNK A   2      36.281  48.128  -9.809  1.00  0.00           H  
HETATM 1332  C   UNK A   2      36.659  48.665  -7.945  1.00  0.00           C  
HETATM 1333  C   UNK A   2      35.291  48.671  -7.597  1.00  0.00           C  
HETATM 1334  H   UNK A   2      34.574  48.622  -8.325  1.00  0.00           H  
HETATM 1335  C   UNK A   2      34.888  48.730  -6.250  1.00  0.00           C  
HETATM 1336  C   UNK A   2      35.858  48.868  -5.243  1.00  0.00           C  
HETATM 1337  H   UNK A   2      35.577  48.946  -4.266  1.00  0.00           H  
HETATM 1338  C   UNK A   2      37.226  48.827  -5.574  1.00  0.00           C  
HETATM 1339  H   UNK A   2      37.930  48.873  -4.834  1.00  0.00           H  
HETATM 1340  C   UNK A   2      37.621  48.666  -6.914  1.00  0.00           C  
HETATM 1341  H   UNK A   2      38.600  48.514  -7.130  1.00  0.00           H  
HETATM 1342  O   UNK A   2      33.549  48.636  -5.981  1.00  0.00           O  
HETATM 1343  C   UNK A   2      33.079  47.349  -5.544  1.00  0.00           C  
HETATM 1344  H   UNK A   2      33.203  47.264  -4.466  1.00  0.00           H  
HETATM 1345  H   UNK A   2      32.008  47.323  -5.760  1.00  0.00           H  
HETATM 1346  C   UNK A   2      33.692  46.097  -6.215  1.00  0.00           C  
HETATM 1347  H   UNK A   2      33.232  45.210  -5.793  1.00  0.00           H  
HETATM 1348  H   UNK A   2      33.501  46.112  -7.287  1.00  0.00           H  
HETATM 1349  H   UNK A   2      34.770  46.062  -6.049  1.00  0.00           H  
HETATM 1350  O   UNK A   2      43.476  53.807  -8.934  1.00  0.00           O  
HETATM 1351  C   UNK A   2      42.890  55.014  -8.396  1.00  0.00           C  
HETATM 1352  H   UNK A   2      43.012  55.818  -9.125  1.00  0.00           H  
HETATM 1353  H   UNK A   2      41.823  54.922  -8.164  1.00  0.00           H  
HETATM 1354  C   UNK A   2      43.613  55.382  -7.084  1.00  0.00           C  
HETATM 1355  H   UNK A   2      43.258  56.347  -6.718  1.00  0.00           H  
HETATM 1356  H   UNK A   2      43.419  54.622  -6.327  1.00  0.00           H  
HETATM 1357  H   UNK A   2      44.689  55.446  -7.247  1.00  0.00           H  
HETATM 1358  O   UNK A   2      43.524  53.355 -11.662  1.00  0.00           O  
HETATM 1359  C   UNK A   2      44.048  52.686 -12.835  1.00  0.00           C  
HETATM 1360  H   UNK A   2      43.468  53.005 -13.698  1.00  0.00           H  
HETATM 1361  H   UNK A   2      43.960  51.596 -12.768  1.00  0.00           H  
HETATM 1362  C   UNK A   2      45.447  53.022 -12.992  1.00  0.00           C  
HETATM 1363  N   UNK A   2      45.817  54.007 -13.809  1.00  0.00           N  
HETATM 1364  H   UNK A   2      45.111  54.496 -14.259  1.00  0.00           H  
HETATM 1365  C   UNK A   2      47.154  54.415 -14.112  1.00  0.00           C  
HETATM 1366  H   UNK A   2      47.904  53.899 -13.506  1.00  0.00           H  
HETATM 1367  H   UNK A   2      47.239  55.485 -13.903  1.00  0.00           H  
HETATM 1368  C   UNK A   2      47.412  54.187 -15.618  1.00  0.00           C  
HETATM 1369  H   UNK A   2      47.000  54.913 -16.321  1.00  0.00           H  
HETATM 1370  C   UNK A   2      47.376  52.740 -16.136  1.00  0.00           C  
HETATM 1371  H   UNK A   2      46.953  52.603 -17.135  1.00  0.00           H  
HETATM 1372  H   UNK A   2      47.250  51.951 -15.391  1.00  0.00           H  
HETATM 1373  C   UNK A   2      48.705  53.498 -16.078  1.00  0.00           C  
HETATM 1374  H   UNK A   2      49.400  53.176 -15.300  1.00  0.00           H  
HETATM 1375  H   UNK A   2      49.099  53.825 -17.044  1.00  0.00           H  
HETATM 1376  O   UNK A   2      46.267  52.380 -12.354  1.00  0.00           O  
CONECT 1267 1268 1269 1273                                                      
CONECT 1268 1267                                                                
CONECT 1269 1267 1270 1309                                                      
CONECT 1270 1269 1271 1307                                                      
CONECT 1271 1270 1272 1306                                                      
CONECT 1272 1271 1273 1305                                                      
CONECT 1273 1267 1272 1274                                                      
CONECT 1274 1273 1275 1276                                                      
CONECT 1275 1274                                                                
CONECT 1276 1274 1277 1281                                                      
CONECT 1277 1276 1278                                                           
CONECT 1278 1277 1279 1304                                                      
CONECT 1279 1278 1280 1303                                                      
CONECT 1280 1279 1281 1302                                                      
CONECT 1281 1276 1280 1282                                                      
CONECT 1282 1281 1283 1284                                                      
CONECT 1283 1282                                                                
CONECT 1284 1282 1285 1300 1301                                                 
CONECT 1285 1284 1286 1290                                                      
CONECT 1286 1285 1287 1299                                                      
CONECT 1287 1286 1288 1298                                                      
CONECT 1288 1287 1289 1293                                                      
CONECT 1289 1288 1290 1292                                                      
CONECT 1290 1285 1289 1291                                                      
CONECT 1291 1290                                                                
CONECT 1292 1289                                                                
CONECT 1293 1288 1294                                                           
CONECT 1294 1293 1295 1296 1297                                                 
CONECT 1295 1294                                                                
CONECT 1296 1294                                                                
CONECT 1297 1294                                                                
CONECT 1298 1287                                                                
CONECT 1299 1286                                                                
CONECT 1300 1284                                                                
CONECT 1301 1284                                                                
CONECT 1302 1280                                                                
CONECT 1303 1279                                                                
CONECT 1304 1278                                                                
CONECT 1305 1272                                                                
CONECT 1306 1271                                                                
CONECT 1307 1270 1308                                                           
CONECT 1308 1307                                                                
CONECT 1309 1269                                                                
CONECT 1310 1311 1316 1358                                                      
CONECT 1311 1310 1312 1350                                                      
CONECT 1312 1311 1313 1314                                                      
CONECT 1313 1312                                                                
CONECT 1314 1312 1315 1320                                                      
CONECT 1315 1314 1316 1318                                                      
CONECT 1316 1310 1315 1317                                                      
CONECT 1317 1316                                                                
CONECT 1318 1315 1319 1325                                                      
CONECT 1319 1318 1320 1323                                                      
CONECT 1320 1314 1319 1321 1322                                                 
CONECT 1321 1320                                                                
CONECT 1322 1320                                                                
CONECT 1323 1319 1324 1330                                                      
CONECT 1324 1323 1325                                                           
CONECT 1325 1318 1324 1326                                                      
CONECT 1326 1325 1327 1328 1329                                                 
CONECT 1327 1326                                                                
CONECT 1328 1326                                                                
CONECT 1329 1326                                                                
CONECT 1330 1323 1331 1332                                                      
CONECT 1331 1330                                                                
CONECT 1332 1330 1333 1340                                                      
CONECT 1333 1332 1334 1335                                                      
CONECT 1334 1333                                                                
CONECT 1335 1333 1336 1342                                                      
CONECT 1336 1335 1337 1338                                                      
CONECT 1337 1336                                                                
CONECT 1338 1336 1339 1340                                                      
CONECT 1339 1338                                                                
CONECT 1340 1332 1338 1341                                                      
CONECT 1341 1340                                                                
CONECT 1342 1335 1343                                                           
CONECT 1343 1342 1344 1345 1346                                                 
CONECT 1344 1343                                                                
CONECT 1345 1343                                                                
CONECT 1346 1343 1347 1348 1349                                                 
CONECT 1347 1346                                                                
CONECT 1348 1346                                                                
CONECT 1349 1346                                                                
CONECT 1350 1311 1351                                                           
CONECT 1351 1350 1352 1353 1354                                                 
CONECT 1352 1351                                                                
CONECT 1353 1351                                                                
CONECT 1354 1351 1355 1356 1357                                                 
CONECT 1355 1354                                                                
CONECT 1356 1354                                                                
CONECT 1357 1354                                                                
CONECT 1358 1310 1359                                                           
CONECT 1359 1358 1360 1361 1362                                                 
CONECT 1360 1359                                                                
CONECT 1361 1359                                                                
CONECT 1362 1359 1363 1376                                                      
CONECT 1363 1362 1364 1365                                                      
CONECT 1364 1363                                                                
CONECT 1365 1363 1366 1367 1368                                                 
CONECT 1366 1365                                                                
CONECT 1367 1365                                                                
CONECT 1368 1365 1369 1370 1373                                                 
CONECT 1369 1368                                                                
CONECT 1370 1368 1371 1372 1373                                                 
CONECT 1371 1370                                                                
CONECT 1372 1370                                                                
CONECT 1373 1368 1370 1374 1375                                                 
CONECT 1374 1373                                                                
CONECT 1375 1373                                                                
CONECT 1376 1362                                                                
MASTER        0    0    0   15    8    0    0    0 1352   24  110   25          
END                                                                             
